# Supplementary material
Source: bioRxiv or medRxiv preprint supplement (https://medrxiv.org/highwire/filestream/97412/field_highwire_adjunct_files/0/2020.09.17.20197038-1.pdf)
Supplement: Supplementary file [file 2020.09.17.20197038-1.pdf]

1 **Supplementary material.**

2  
3 **Data sources and selection**

4 We analyzed dataset information based on the date test results were reported, regardless of the date in which the test was  
5 done. Because the databases do not have information on when the test result was reported, we obtained this by information  
6 by comparing every database uploaded between April 12th and August 21st by individual identifier. For example, if an  
7 individual was tested at May 1st their result will appear “pending” in all daily uploaded databases until the test result is in  
8 and registered. This could be a couple of days or weeks from the testing date. Regardless, if the test result is first available  
9 in the database uploaded on May 10th, that is the date in which the individual will be counted. We used as report date for  
10 an individual, the entry date of the first dataset with a positive or negative result of his/her test. This was not possible for  
11 people tested before April 12th and already had a result, so their result was included as the baseline count.

12 The final total tests (1 280 910) were obtained by adding new cases present in the current database to those accumulated  
13 until that date, removing in the process all patients that met exclusion criteria. In the August 31st database a total of 1 343  
14 730 tests were reported (once exclusion criteria were applied), with 77 728 records having a pending test result, 1208  
15 patients had >21 days with symptoms at time of testing, and none had a missing ID, a total of 1 264 794. There remains a  
16 difference of 16 116 patients. All databases supposedly include all information present in previous databases. The  
17 discrepancy in total tests is explained because this is not always the case, as during the analysis we observed that some  
18 patients included in early databases were sometimes excluded from later databases. We believe that this does not interfere  
19 with our methods or estimates, as those changes were done retrospectively and we use cases as they are reported to make  
20 estimates in real time.

21  
22 **Table S1. Calculated test sensitivities.**

| Day of symptoms | Test Sensitivity (95% CL) |
|-----------------|---------------------------|
| 1               | 62% (35-82%)              |
| 2               | 75% (60-86%)              |
| 3               | 80% (69-88%)              |
| 4               | 81% (71-88%)              |
| 5               | 80% (70-87%)              |
| 6               | 78% (68-85%)              |
| 7               | 75% (64-83%)              |
| 8               | 72% (60-80%)              |
| 9               | 68% (56-77%)              |
| 10              | 63% (51-73%)              |
| 11              | 59% (47-70%)              |
| 12              | 55% (42-66%)              |
| 13              | 50% (38-62%)              |
| 14              | 47% (34-58%)              |
| 15              | 43% (31-55%)              |
| 16              | 40% (28-52%)              |
| 17              | 37% (26-49%)              |
| 18              | 35% (24-46%)              |
| 19              | 32% (22-44%)              |
| 20              | 31% (20-42%)              |
| 21              | 29% (19-40%)              |

23 Day one of symptoms is the day symptoms started. Test sensitivities were obtained from an adjustment of the analysis by  
24 Kucirka et al. Test sensitivity was rounded to nearest integer for clarity. Represented in parentheses are the 95% confidence  
25 limits.

26 Figure S1. 7 day moving average of time from symptom onset to testing

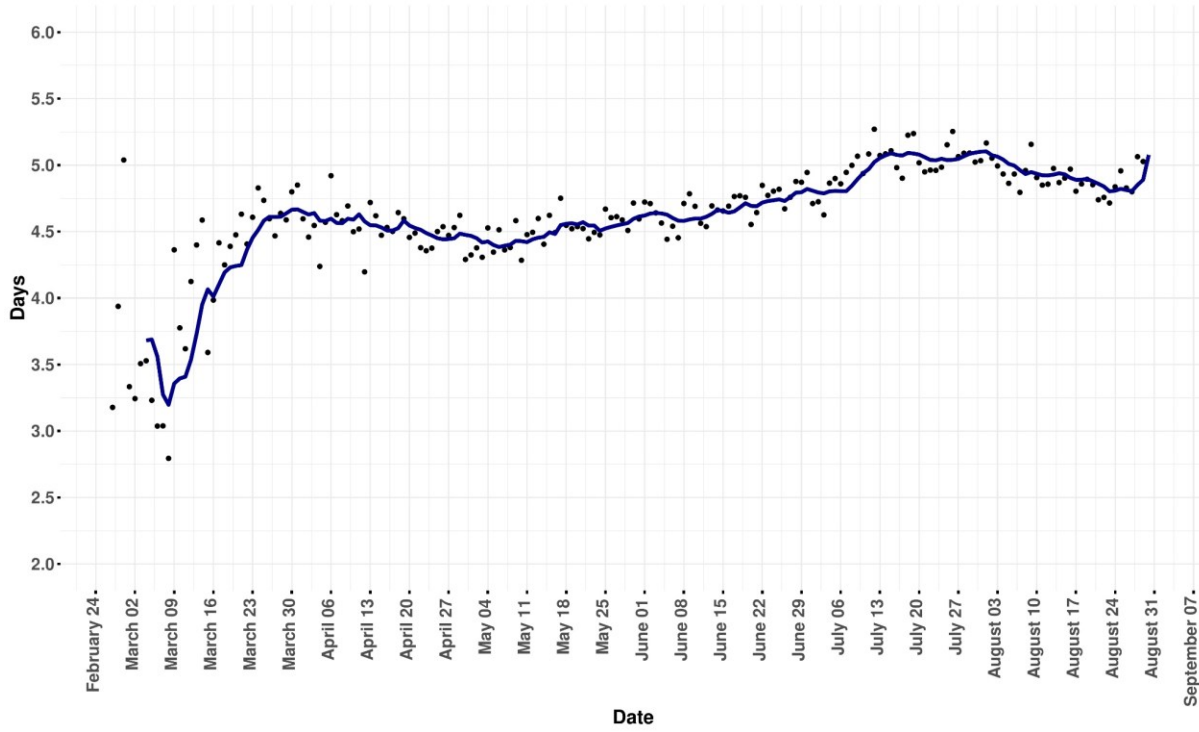

27  
28  
29  
30  
31  
32  
33  
34  
35  
36  
37  
38  
39  
40  
41  
42  
43  
44  
45  
46  
47  
48  
49  
50  
51  
52

53 **BY STATE ANALYSES**

54 **The rest of the supplementary material presents the main analysis stratified by state. All graphs represent the average**  
 55 **test estimates.**

56

57

**Table SE. Official and estimated COVID-19 cases by date of reporting in AGUASCALIENTES**

| Variable                       | Official count | Average test estimates | Best test estimates | Worst test estimates |
|--------------------------------|----------------|------------------------|---------------------|----------------------|
| N                              | 17 180         | 17 180                 | 17 180              | 17 180               |
| Positive tests                 | 5730 (33.4%)   | 7699 (44.8%)           | 6516 (37.9%)        | 10 028 (58.4%)       |
| Negative tests                 | 11 450 (66.6%) | 9481 (55.2%)           | 10 664 (62.1%)      | 7152 (41.6%)         |
| Estimated false negative tests | -              | 1969 (11.5%)           | 786 (4.6%)          | 4298 (25%)           |
| Overall ICU count              | 28             | 35                     | 28                  | 56                   |
| Overall Death count            | 48             | 63                     | 51                  | 85                   |

58

59

**Figure SE. AGUASCALIENTES**

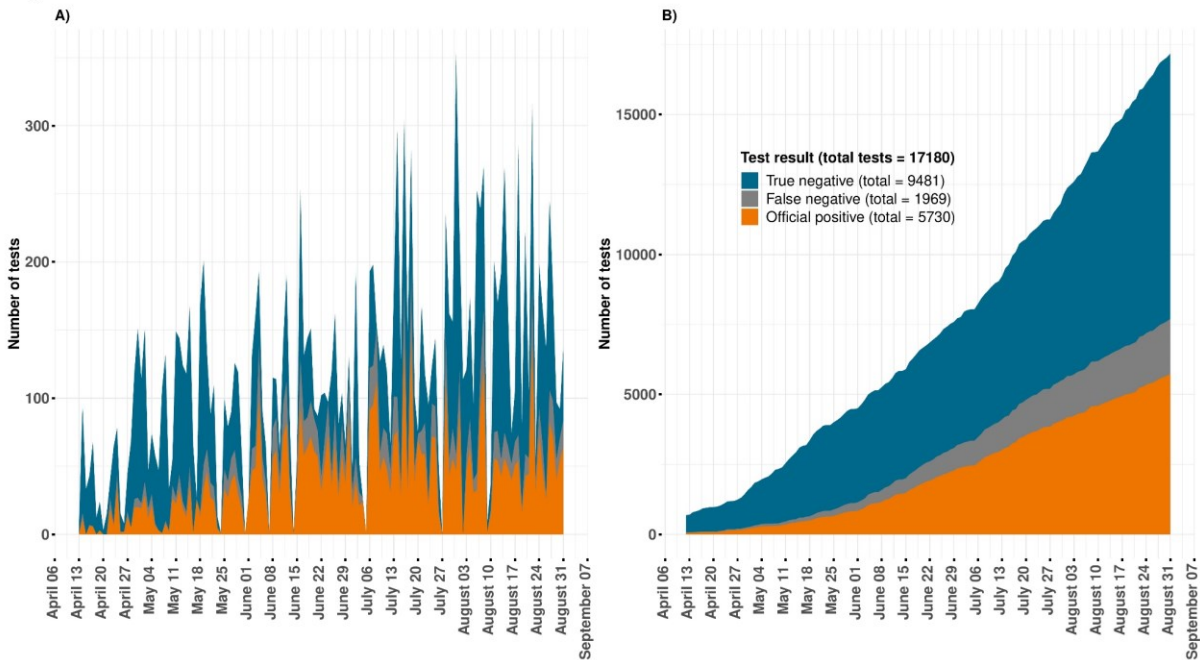

Study period February 27 – August 31 (shown from April 13). A) represents daily counts, while B) represents accumulated cases.

60

61

**Table SE. Official and estimated COVID-19 cases by date of reporting in BAJA CALIFORNIA**

| Variable                       | Official count | Average test estimates | Best test estimates | Worst test estimates |
|--------------------------------|----------------|------------------------|---------------------|----------------------|
| N                              | 27 157         | 27 157                 | 27 157              | 27 157               |
| Positive tests                 | 17 197 (63.3%) | 23 009 (84.7%)         | 19 719 (72.6%)      | 27 157 (100%)        |
| Negative tests                 | 9960 (36.7%)   | 4148 (15.3%)           | 7438 (27.4%)        | 0 (0%)               |
| Estimated false negative tests | -              | 5812 (21.4%)           | 2522 (9.3%)         | 9960 (36.7%)         |
| Overall ICU count              | 94             | 139                    | 102                 | 182                  |
| Overall Death count            | 1036           | 1804                   | 1373                | 2707                 |

62

63

**Figure SE. BAJA CALIFORNIA**

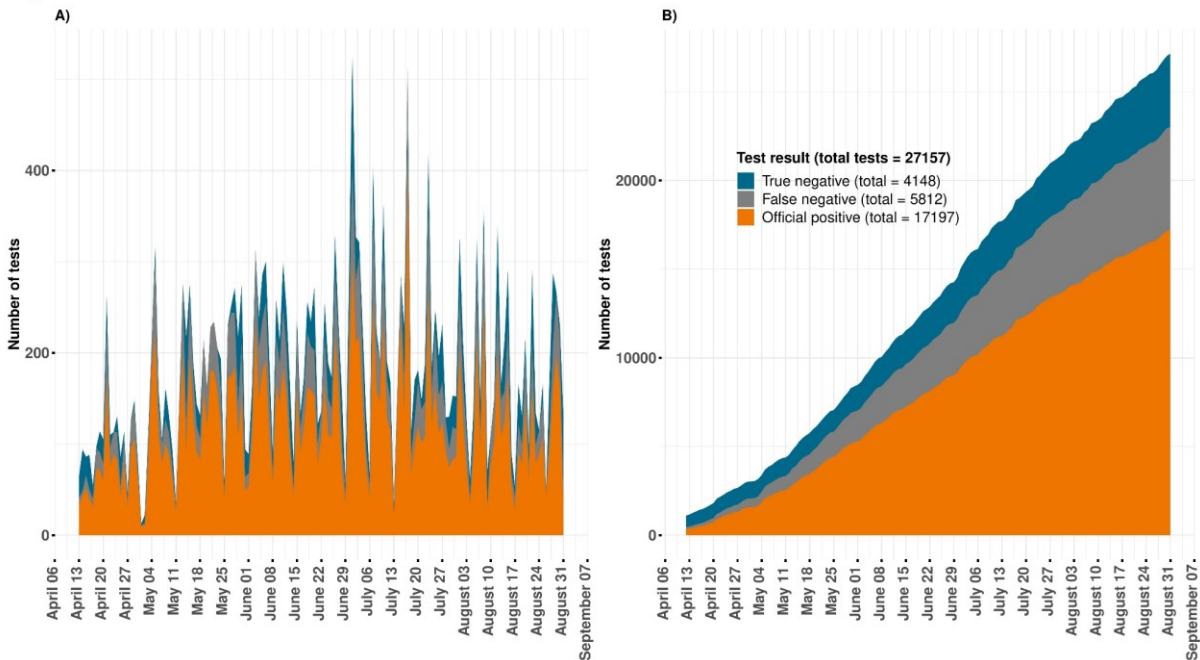

Study period February 27 – August 31 (shown from April 13). A) represents daily counts, while B) represents accumulated cases.

64

65

**Table SE. Official and estimated COVID-19 cases by date of reporting in BAJA CALIFORNIA SUR**

| Variable                       | Official count | Average test estimates | Best test estimates | Worst test estimates |
|--------------------------------|----------------|------------------------|---------------------|----------------------|
| N                              | 16 807         | 16 807                 | 16 807              | 16 807               |
| Positive tests                 | 7639 (45.5%)   | 9654 (57.4%)           | 8583 (51.1%)        | 11 933 (71%)         |
| Negative tests                 | 9168 (54.5%)   | 7153 (42.6%)           | 8224 (48.9%)        | 4874 (29%)           |
| Estimated false negative tests | -              | 2015 (12%)             | 944 (5.6%)          | 4294 (25.5%)         |
| Overall ICU count              | 70             | 77                     | 70                  | 90                   |
| Overall Death count            | 27             | 28                     | 27                  | 41                   |

66

67

**Figure SE. BAJA CALIFORNIA SUR**

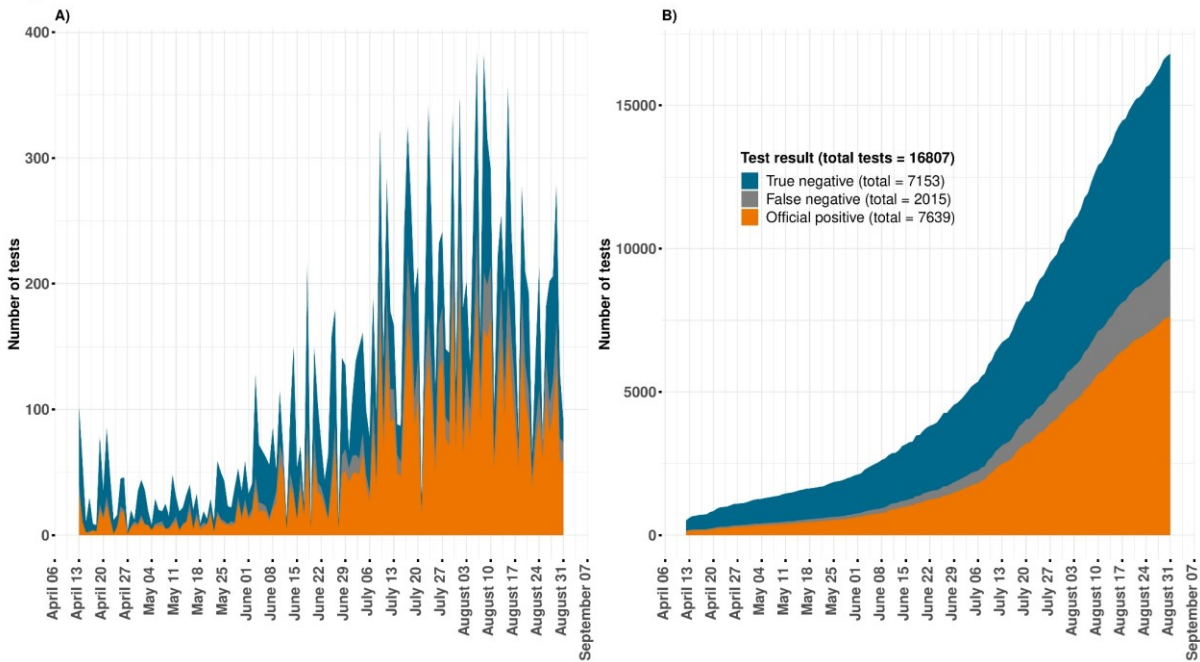

Study period February 27 – August 31 (shown from April 13). A) represents daily counts, while B) represents accumulated cases.

68

69

**Table SE. Official and estimated COVID-19 cases by date of reporting in CAMPECHE**

| Variable                       | Official count | Average test estimates | Best test estimates | Worst test estimates |
|--------------------------------|----------------|------------------------|---------------------|----------------------|
| N                              | 11 152         | 11 152                 | 11 152              | 11 152               |
| Positive tests                 | 5743 (51.5%)   | 7850 (70.4%)           | 6704 (60.1%)        | 10 048 (90.1%)       |
| Negative tests                 | 5409 (48.5%)   | 3302 (29.6%)           | 4448 (39.9%)        | 1104 (9.9%)          |
| Estimated false negative tests | -              | 2107 (18.9%)           | 961 (8.6%)          | 4305 (38.6%)         |
| Overall ICU count              | 224            | 249                    | 231                 | 280                  |
| Overall Death count            | 112            | 218                    | 160                 | 329                  |

70

71

**Figure SE. CAMPECHE**

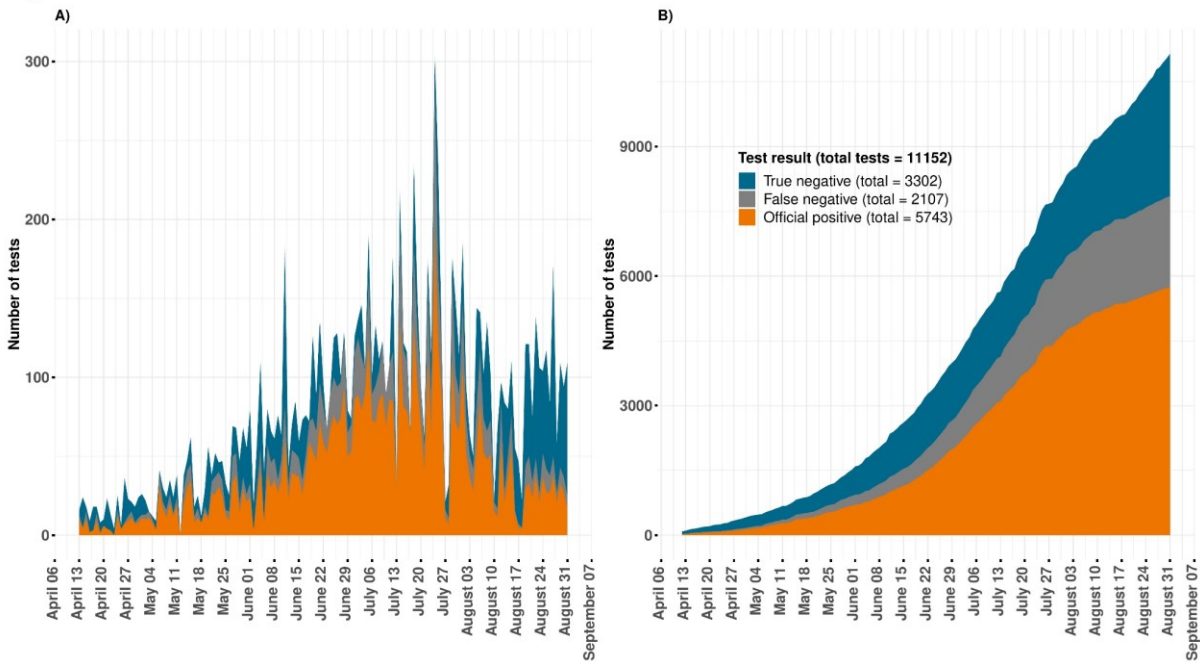

Study period February 27 – August 31 (shown from April 13). A) represents daily counts, while B) represents accumulated cases.

72

73

**Table SE. Official and estimated COVID-19 cases by date of reporting in CHIAPAS**

| Variable                       | Official count | Average test estimates | Best test estimates | Worst test estimates |
|--------------------------------|----------------|------------------------|---------------------|----------------------|
| N                              | 10 073         | 10 073                 | 10 073              | 10 073               |
| Positive tests                 | 6148 (61%)     | 7819 (77.6%)           | 6803 (67.5%)        | 9887 (98.2%)         |
| Negative tests                 | 3925 (39%)     | 2254 (22.4%)           | 3270 (32.5%)        | 186 (1.8%)           |
| Estimated false negative tests | -              | 1671 (16.6%)           | 655 (6.5%)          | 3739 (37.1%)         |
| Overall ICU count              | 198            | 229                    | 208                 | 281                  |
| Overall Death count            | 277            | 526                    | 361                 | 847                  |

74

75

**Figure SE. CHIAPAS**

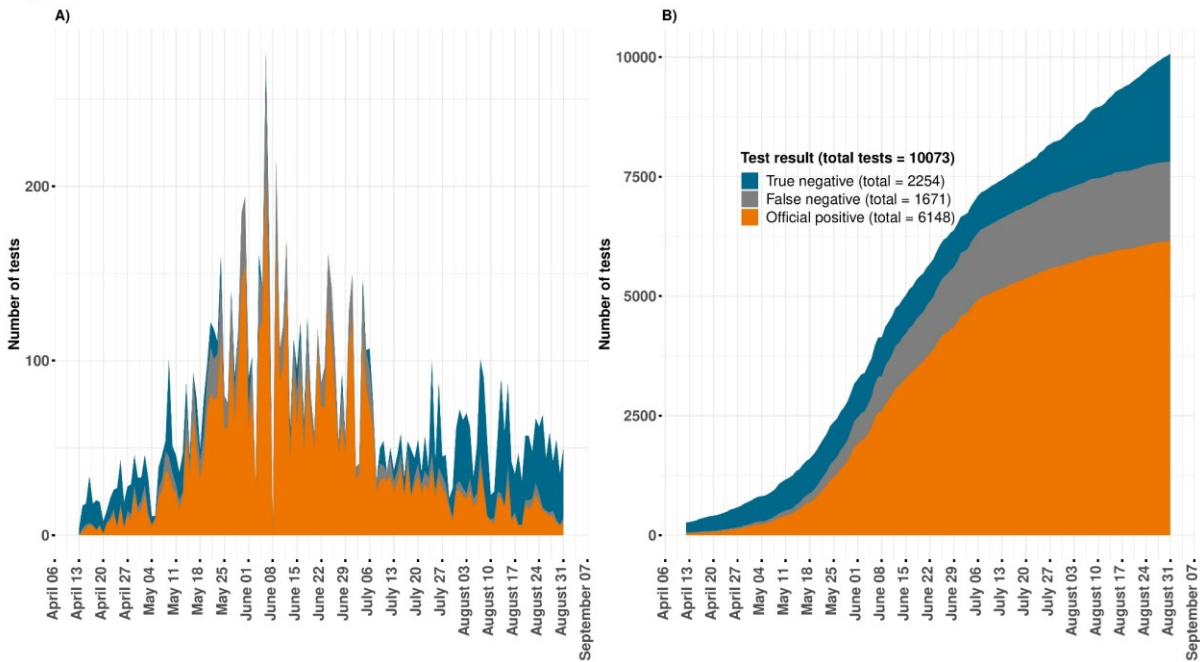

Study period February 27 – August 31 (shown from April 13). A) represents daily counts, while B) represents accumulated cases.

76

77

**Table SE. Official and estimated COVID-19 cases by date of reporting in CHIHUAHUA**

| Variable                       | Official count | Average test estimates | Best test estimates | Worst test estimates |
|--------------------------------|----------------|------------------------|---------------------|----------------------|
| N                              | 15 586         | 15 586                 | 15 586              | 15 586               |
| Positive tests                 | 7861 (50.4%)   | 10 456 (67.1%)         | 8638 (55.4%)        | 14 257 (91.5%)       |
| Negative tests                 | 7725 (49.6%)   | 5130 (32.9%)           | 6948 (44.6%)        | 1329 (8.5%)          |
| Estimated false negative tests | -              | 2595 (16.6%)           | 777 (5%)            | 6396 (41%)           |
| Overall ICU count              | 603            | 744                    | 638                 | 956                  |
| Overall Death count            | 456            | 637                    | 500                 | 909                  |

78

79

**Figure SE. CHIHUAHUA**

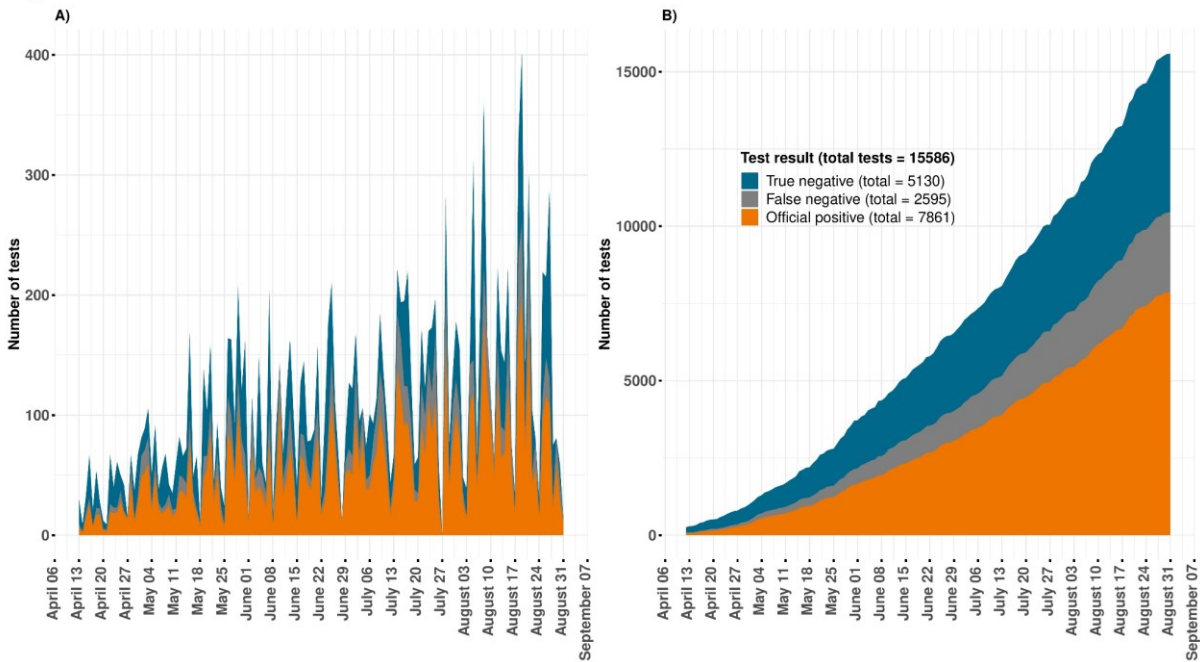

Study period February 27 – August 31 (shown from April 13). A) represents daily counts, while B) represents accumulated cases.

80

81



**Table SE. Official and estimated COVID-19 cases by date of reporting in CIUDAD DE MEXICO**

| Variable                       | Official count  | Average test estimates | Best test estimates | Worst test estimates |
|--------------------------------|-----------------|------------------------|---------------------|----------------------|
| N                              | 297 668         | 297 668                | 297 668             | 297 668              |
| Positive tests                 | 118 009 (39.6%) | 168 089 (56.5%)        | 144 621 (48.6%)     | 220 218 (74%)        |
| Negative tests                 | 179 659 (60.4%) | 129 579 (43.5%)        | 153 047 (51.4%)     | 77 450 (26%)         |
| Estimated false negative tests | -               | 50 080 (16.8%)         | 26 612 (8.9%)       | 102 209 (34.3%)      |
| Overall ICU count              | 1438            | 1755                   | 1604                | 2077                 |
| Overall Death count            | 2116            | 2829                   | 2490                | 3569                 |

82

83

**Figure SE. CIUDAD DE MÉXICO**

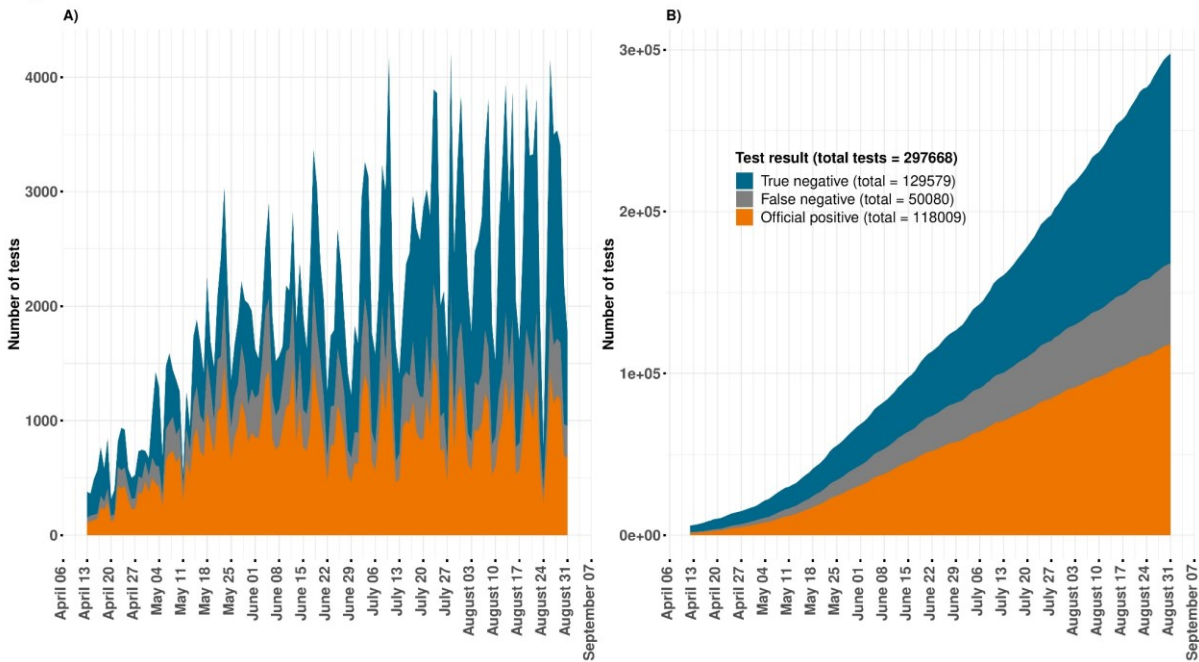

Study period February 27 – August 31 (shown from April 13). A) represents daily counts, while B) represents accumulated cases.

84

85

**Table SE. Official and estimated COVID-19 cases by date of reporting in COAHUILA**

| Variable                       | Official count | Average test estimates | Best test estimates | Worst test estimates |
|--------------------------------|----------------|------------------------|---------------------|----------------------|
| N                              | 50 076         | 50 076                 | 50 076              | 50 076               |
| Positive tests                 | 22 147 (44.2%) | 30 176 (60.3%)         | 25 862 (51.6%)      | 39 774 (79.4%)       |
| Negative tests                 | 27 929 (55.8%) | 19 900 (39.7%)         | 24 214 (48.4%)      | 10 302 (20.6%)       |
| Estimated false negative tests | -              | 8029 (16%)             | 3715 (7.4%)         | 17 627 (35.2%)       |
| Overall ICU count              | 58             | 83                     | 69                  | 115                  |
| Overall Death count            | 465            | 684                    | 570                 | 950                  |

86

87

**Figure SE. COAHUILA**

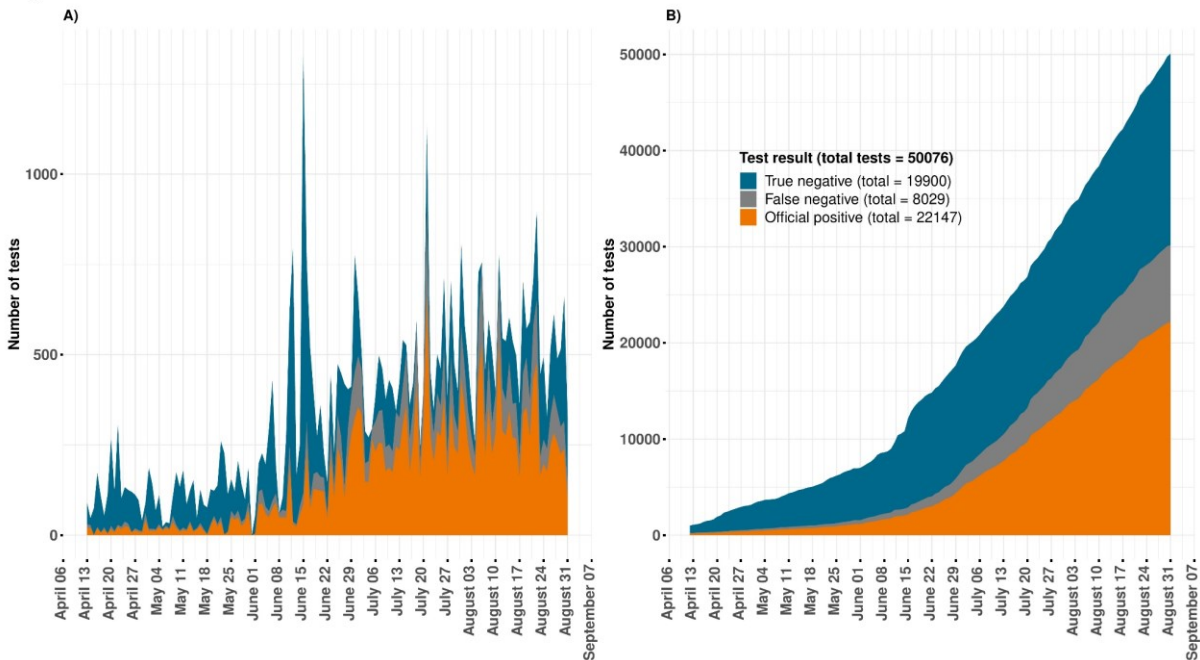

88

89

Study period February 27 – August 31 (shown from April 13). A) represents daily counts, while B) represents accumulated cases.

**Table SE. Official and estimated COVID-19 cases by date of reporting in COLIMA**

| Variable                       | Official count | Average test estimates | Best test estimates | Worst test estimates |
|--------------------------------|----------------|------------------------|---------------------|----------------------|
| N                              | 6512           | 6512                   | 6512                | 6512                 |
| Positive tests                 | 3798 (58.3%)   | 4696 (72.1%)           | 4222 (64.8%)        | 5728 (88%)           |
| Negative tests                 | 2714 (41.7%)   | 1816 (27.9%)           | 2290 (35.2%)        | 784 (12%)            |
| Estimated false negative tests | -              | 898 (13.8%)            | 424 (6.5%)          | 1930 (29.6%)         |
| Overall ICU count              | 82             | 92                     | 85                  | 112                  |
| Overall Death count            | 106            | 147                    | 122                 | 206                  |

90

91

**Figure SE. COLIMA**

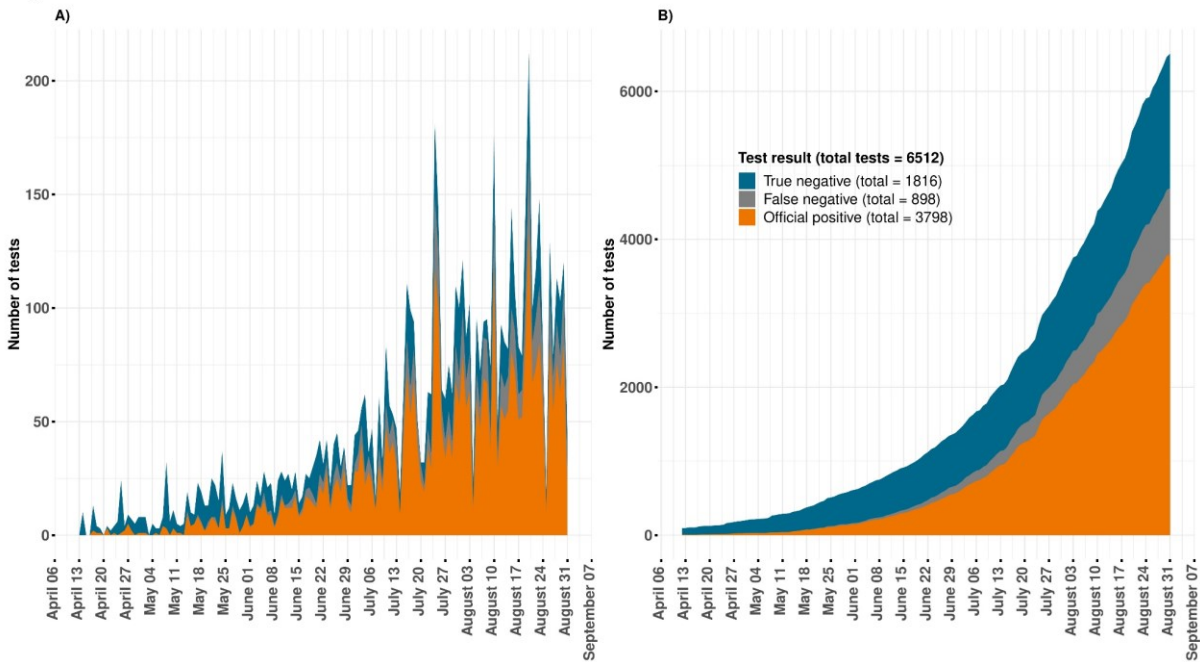

Study period February 27 – August 31 (shown from April 13). A) represents daily counts, while B) represents accumulated cases.

92

93

**Table SE. Official and estimated COVID-19 cases by date of reporting in DURANGO**

| Variable                       | Official count | Average test estimates | Best test estimates | Worst test estimates |
|--------------------------------|----------------|------------------------|---------------------|----------------------|
| N                              | 18 663         | 18 663                 | 18 663              | 18 663               |
| Positive tests                 | 6414 (34.4%)   | 8566 (45.9%)           | 7378 (39.5%)        | 11 209 (60.1%)       |
| Negative tests                 | 12 249 (65.6%) | 10 097 (54.1%)         | 11 285 (60.5%)      | 7454 (39.9%)         |
| Estimated false negative tests | -              | 2152 (11.5%)           | 964 (5.2%)          | 4795 (25.7%)         |
| Overall ICU count              | 80             | 86                     | 80                  | 94                   |
| Overall Death count            | 35             | 38                     | 35                  | 44                   |

94

95

**Figure SE. DURANGO**

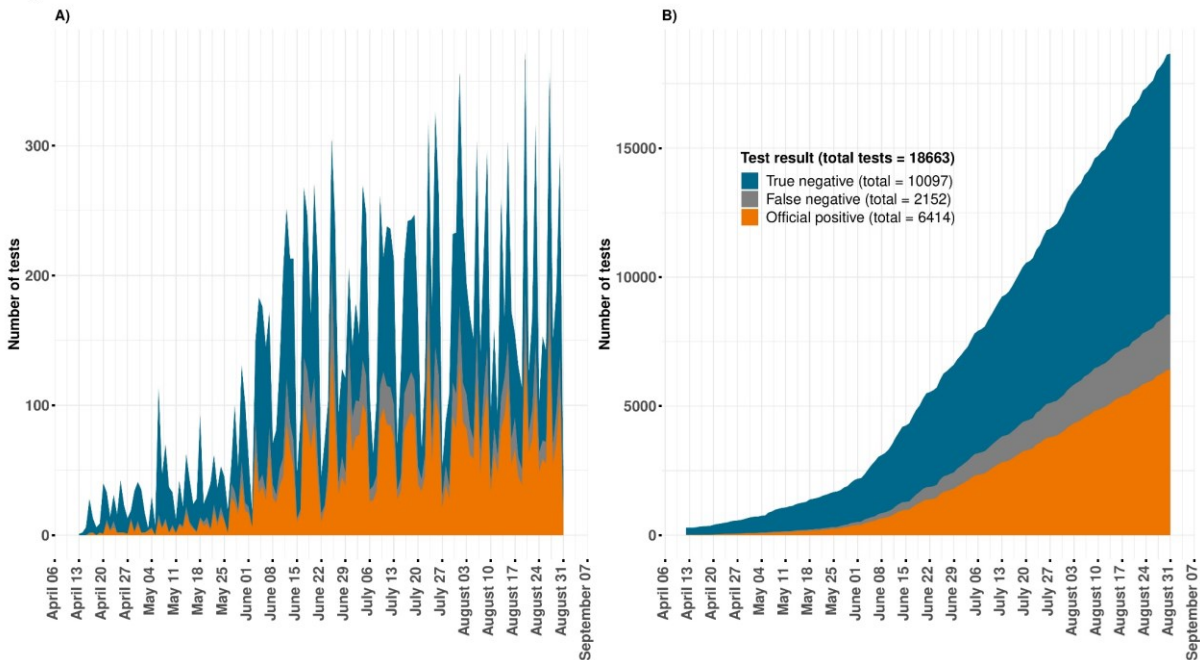

Study period February 27 – August 31 (shown from April 13). A) represents daily counts, while B) represents accumulated cases.

96

97

**Table SE. Official and estimated COVID-19 cases by date of reporting in ESTADO DE MÉXICO**

| Variable                       | Official count | Average test estimates | Best test estimates | Worst test estimates |
|--------------------------------|----------------|------------------------|---------------------|----------------------|
| N                              | 105 239        | 105 239                | 105 239             | 105 239              |
| Positive tests                 | 49 647 (47.2%) | 67 627 (64.3%)         | 58 513 (55.6%)      | 87 646 (83.3%)       |
| Negative tests                 | 55 592 (52.8%) | 37 612 (35.7%)         | 46 726 (44.4%)      | 17 593 (16.7%)       |
| Estimated false negative tests | -              | 17 980 (17.1%)         | 8866 (8.4%)         | 37 999 (36.1%)       |
| Overall ICU count              | 687            | 809                    | 734                 | 942                  |
| Overall Death count            | 2924           | 4348                   | 3595                | 6065                 |

98

99

**Figure SE. ESTADO DE MÉXICO**

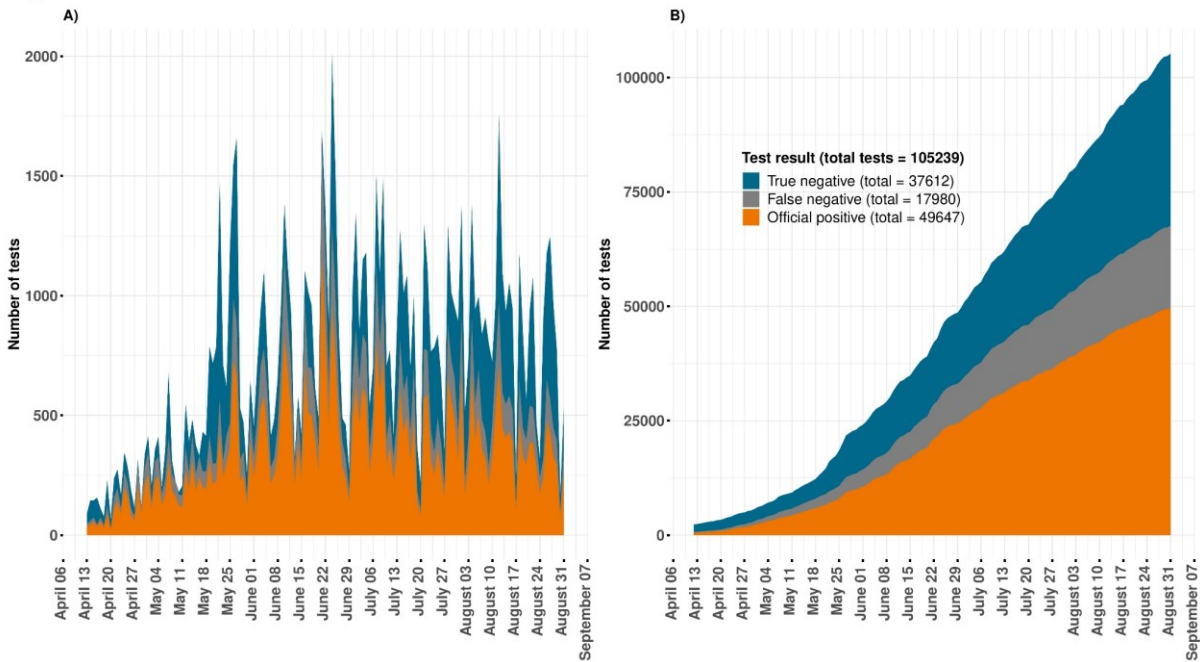

Study period February 27 – August 31 (shown from April 13). A) represents daily counts, while B) represents accumulated cases.

100

101

**Table SE. Official and estimated COVID-19 cases by date of reporting in GUANAJUATO**

| Variable                       | Official count | Average test estimates | Best test estimates | Worst test estimates |
|--------------------------------|----------------|------------------------|---------------------|----------------------|
| N                              | 73 588         | 73 588                 | 73 588              | 73 588               |
| Positive tests                 | 31 736 (43.1%) | 41 197 (56%)           | 36 692 (49.9%)      | 50 156 (68.2%)       |
| Negative tests                 | 41 852 (56.9%) | 32 391 (44%)           | 36 896 (50.1%)      | 23 432 (31.8%)       |
| Estimated false negative tests | -              | 9461 (12.9%)           | 4956 (6.7%)         | 18 420 (25%)         |
| Overall ICU count              | 261            | 289                    | 267                 | 332                  |
| Overall Death count            | 465            | 600                    | 532                 | 739                  |

102

103

**Figure SE. GUANAJUATO**

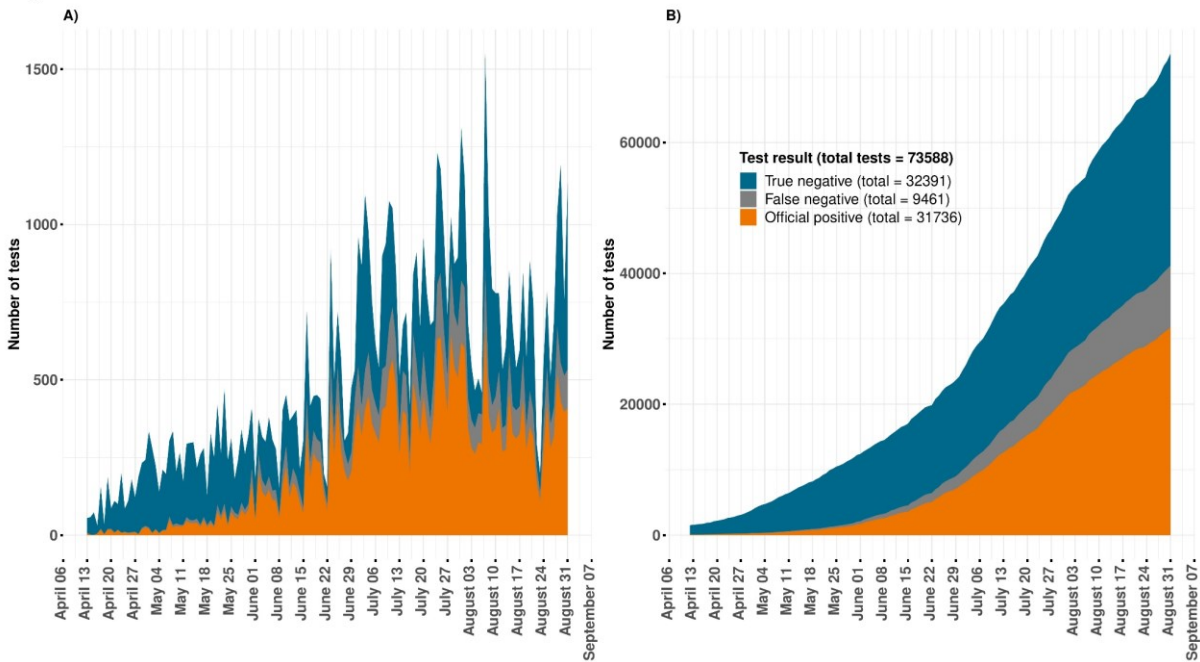

Study period February 27 – August 31 (shown from April 13). A) represents daily counts, while B) represents accumulated cases.

104

105

**Table SE. Official and estimated COVID-19 cases by date of reporting in GUERRERO**

| Variable                       | Official count | Average test estimates | Best test estimates | Worst test estimates |
|--------------------------------|----------------|------------------------|---------------------|----------------------|
| N                              | 24 570         | 24 570                 | 24 570              | 24 570               |
| Positive tests                 | 14 659 (59.7%) | 19 038 (77.5%)         | 16 860 (68.6%)      | 23 298 (94.8%)       |
| Negative tests                 | 9911 (40.3%)   | 5532 (22.5%)           | 7710 (31.4%)        | 1272 (5.2%)          |
| Estimated false negative tests | -              | 4379 (17.8%)           | 2201 (9%)           | 8639 (35.2%)         |
| Overall ICU count              | 375            | 436                    | 394                 | 500                  |
| Overall Death count            | 604            | 1030                   | 814                 | 1449                 |

106

107

**Figure SE. GUERRERO**

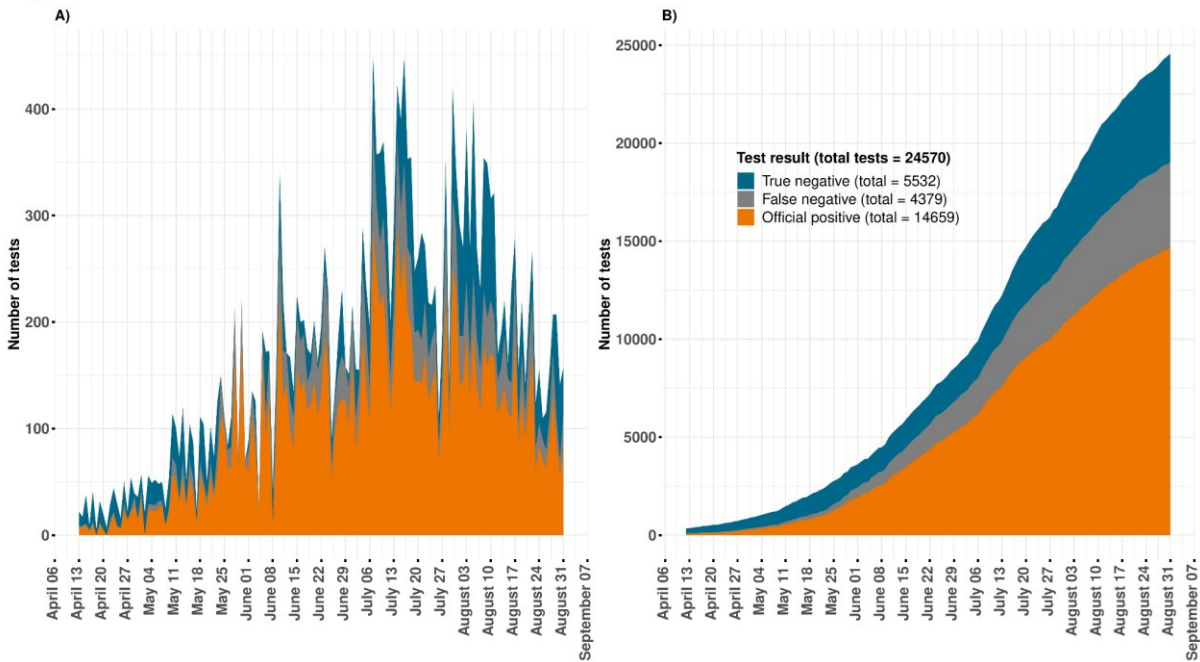

Study period February 27 – August 31 (shown from April 13). A) represents daily counts, while B) represents accumulated cases.

108

109



**Table SE. Official and estimated COVID-19 cases by date of reporting in HIDALGO**

| Variable                       | Official count | Average test estimates | Best test estimates | Worst test estimates |
|--------------------------------|----------------|------------------------|---------------------|----------------------|
| N                              | 16 666         | 16 666                 | 16 666              | 16 666               |
| Positive tests                 | 10 095 (60.6%) | 13 208 (79.3%)         | 11 517 (69.1%)      | 16 365 (98.2%)       |
| Negative tests                 | 6571 (39.4%)   | 3458 (20.7%)           | 5149 (30.9%)        | 301 (1.8%)           |
| Estimated false negative tests | -              | 3113 (18.7%)           | 1422 (8.5%)         | 6270 (37.6%)         |
| Overall ICU count              | 116            | 135                    | 118                 | 163                  |
| Overall Death count            | 348            | 537                    | 426                 | 752                  |

110

111

**Figure SE. HIDALGO**

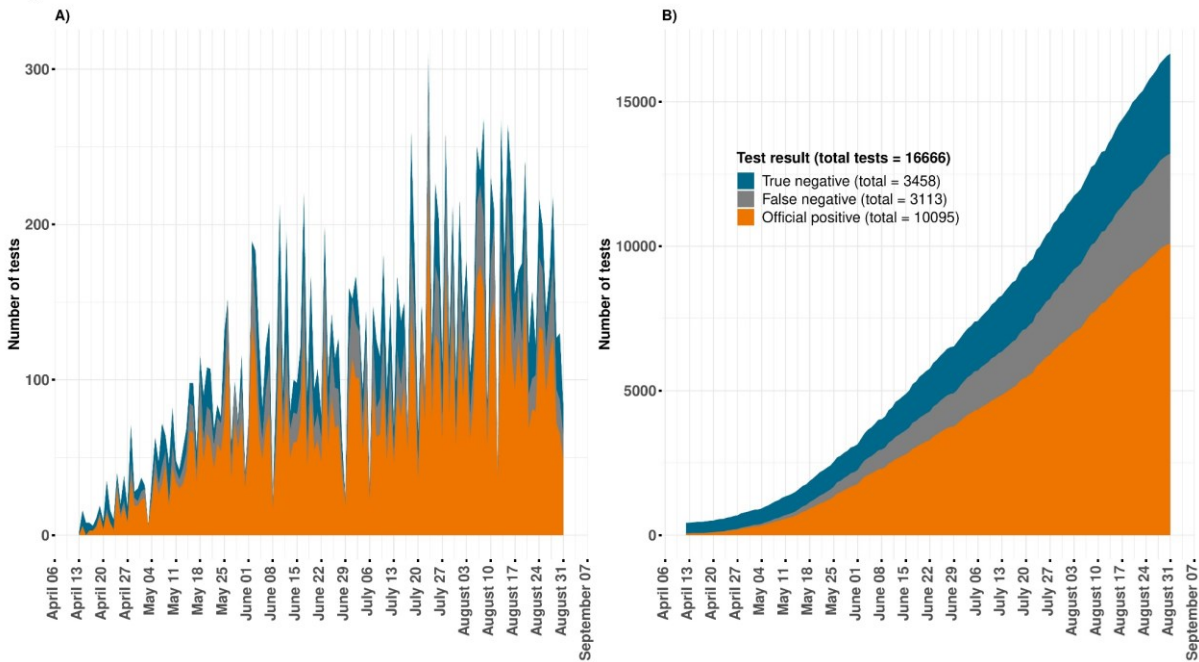

Study period February 27 – August 31 (shown from April 13). A) represents daily counts, while B) represents accumulated cases.

112

113



**Table SE. Official and estimated COVID-19 cases by date of reporting in JALISCO**

| Variable                       | Official count | Average test estimates | Best test estimates | Worst test estimates |
|--------------------------------|----------------|------------------------|---------------------|----------------------|
| N                              | 50 792         | 50 792                 | 50 792              | 50 792               |
| Positive tests                 | 20 525 (40.4%) | 27 838 (54.8%)         | 24 089 (47.4%)      | 35 906 (70.7%)       |
| Negative tests                 | 30 267 (59.6%) | 22 954 (45.2%)         | 26 703 (52.6%)      | 14 886 (29.3%)       |
| Estimated false negative tests | -              | 7313 (14.4%)           | 3564 (7%)           | 15 381 (30.3%)       |
| Overall ICU count              | 488            | 567                    | 526                 | 662                  |
| Overall Death count            | 523            | 698                    | 612                 | 895                  |

114

115

**Figure SE. JALISCO**

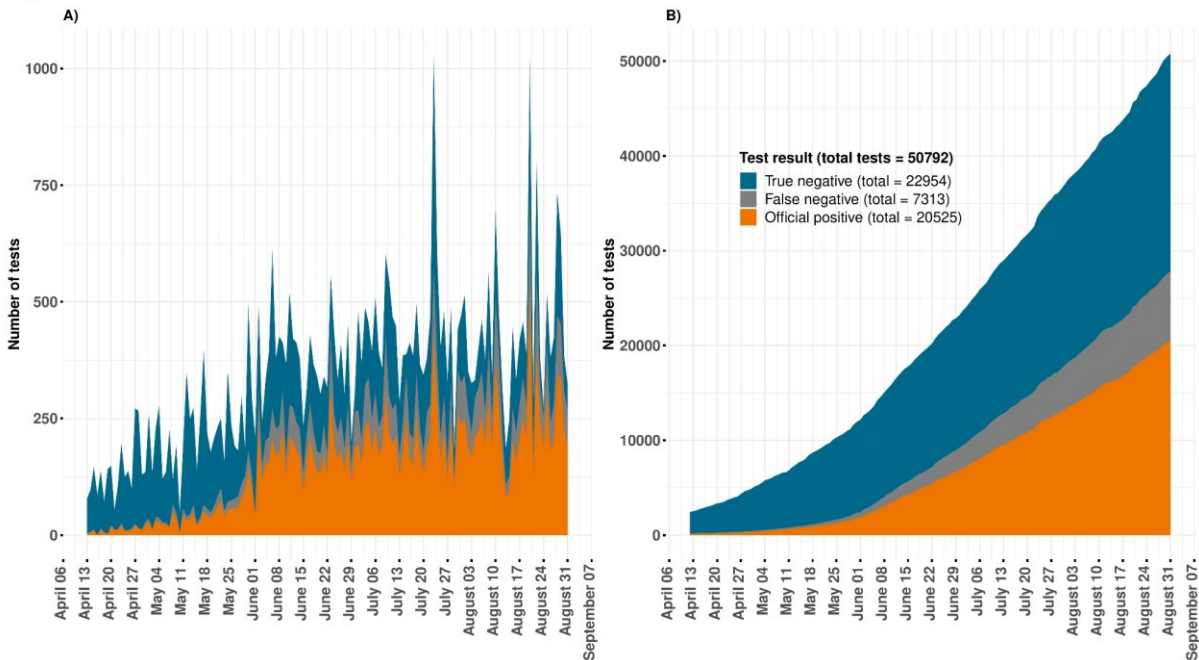

Study period February 27 – August 31 (shown from April 13). A) represents daily counts, while B) represents accumulated cases.

116

117

118

119

**Table SE. Official and estimated COVID-19 cases by date of reporting in MICHOACÁN**

| Variable                       | Official count | Average test estimates | Best test estimates | Worst test estimates |
|--------------------------------|----------------|------------------------|---------------------|----------------------|
| N                              | 37 810         | 37 810                 | 37 810              | 37 810               |
| Positive tests                 | 15 346 (40.6%) | 21 136 (55.9%)         | 18 357 (48.6%)      | 26 676 (70.6%)       |
| Negative tests                 | 22 464 (59.4%) | 16 674 (44.1%)         | 19 453 (51.4%)      | 11 134 (29.4%)       |
| Estimated false negative tests | -              | 5790 (15.3%)           | 3011 (8%)           | 11 330 (30%)         |
| Overall ICU count              | 88             | 108                    | 93                  | 143                  |
| Overall Death count            | 305            | 394                    | 351                 | 492                  |

120

121

**Figure SE. MICHOACÁN**

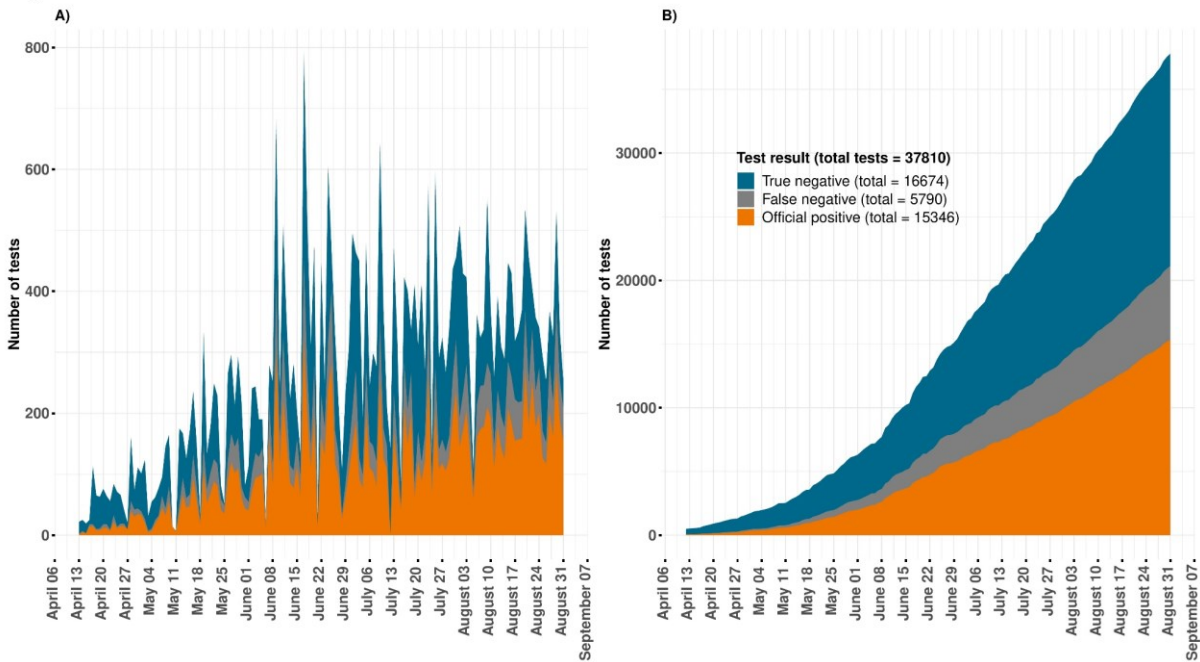

Study period February 27 – August 31 (shown from April 13). A) represents daily counts, while B) represents accumulated cases.

122

123

**Table SE. Official and estimated COVID-19 cases by date of reporting in MORELOS**

| Variable                       | Official count | Average test estimates | Best test estimates | Worst test estimates |
|--------------------------------|----------------|------------------------|---------------------|----------------------|
| N                              | 10 611         | 10 611                 | 10 611              | 10 611               |
| Positive tests                 | 5301 (50%)     | 6571 (61.9%)           | 5743 (54.1%)        | 8308 (78.3%)         |
| Negative tests                 | 5310 (50%)     | 4040 (38.1%)           | 4868 (45.9%)        | 2303 (21.7%)         |
| Estimated false negative tests | -              | 1270 (12%)             | 442 (4.2%)          | 3007 (28.3%)         |
| Overall ICU count              | 41             | 43                     | 41                  | 51                   |
| Overall Death count            | 421            | 920                    | 523                 | 1714                 |

124

125

**Figure SE. MORELOS**

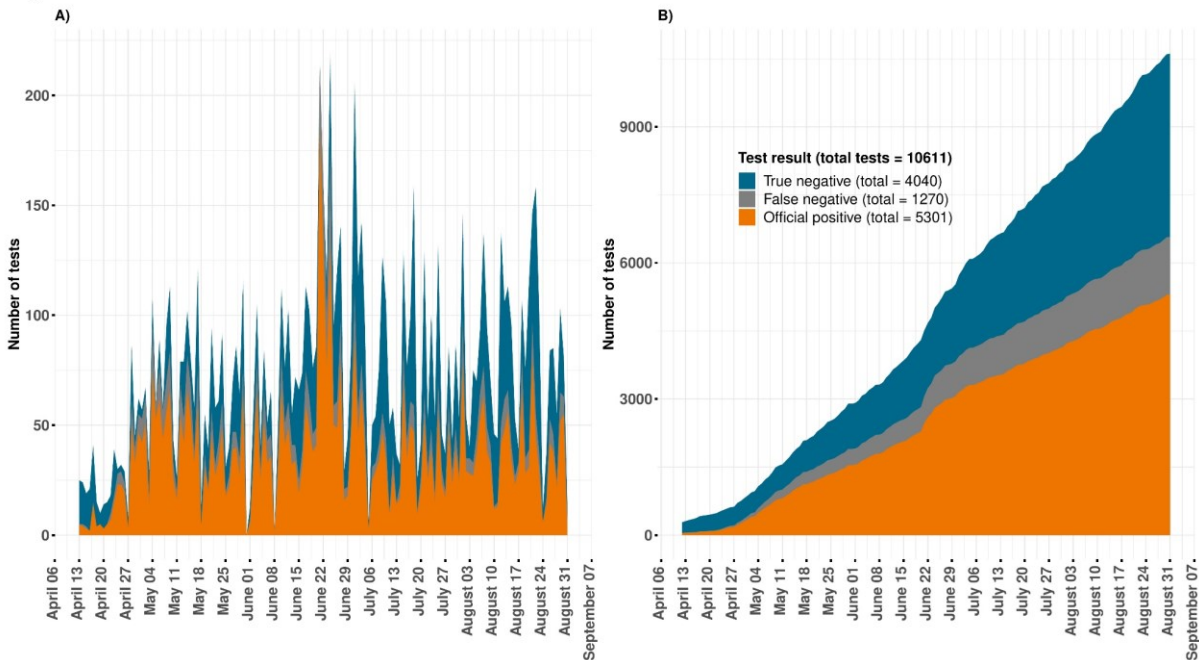

Study period February 27 – August 31 (shown from April 13). A) represents daily counts, while B) represents accumulated cases.

126

127

**Table SE. Official and estimated COVID-19 cases by date of reporting in NAYARIT**

| Variable                       | Official count | Average test estimates | Best test estimates | Worst test estimates |
|--------------------------------|----------------|------------------------|---------------------|----------------------|
| N                              | 8645           | 8645                   | 8645                | 8645                 |
| Positive tests                 | 5003 (57.9%)   | 6260 (72.4%)           | 5564 (64.4%)        | 7621 (88.2%)         |
| Negative tests                 | 3642 (42.1%)   | 2385 (27.6%)           | 3081 (35.6%)        | 1024 (11.8%)         |
| Estimated false negative tests | -              | 1257 (14.5%)           | 561 (6.5%)          | 2618 (30.3%)         |
| Overall ICU count              | 163            | 171                    | 163                 | 190                  |
| Overall Death count            | 118            | 163                    | 132                 | 215                  |

128

129

**Figure SE. NAYARIT**

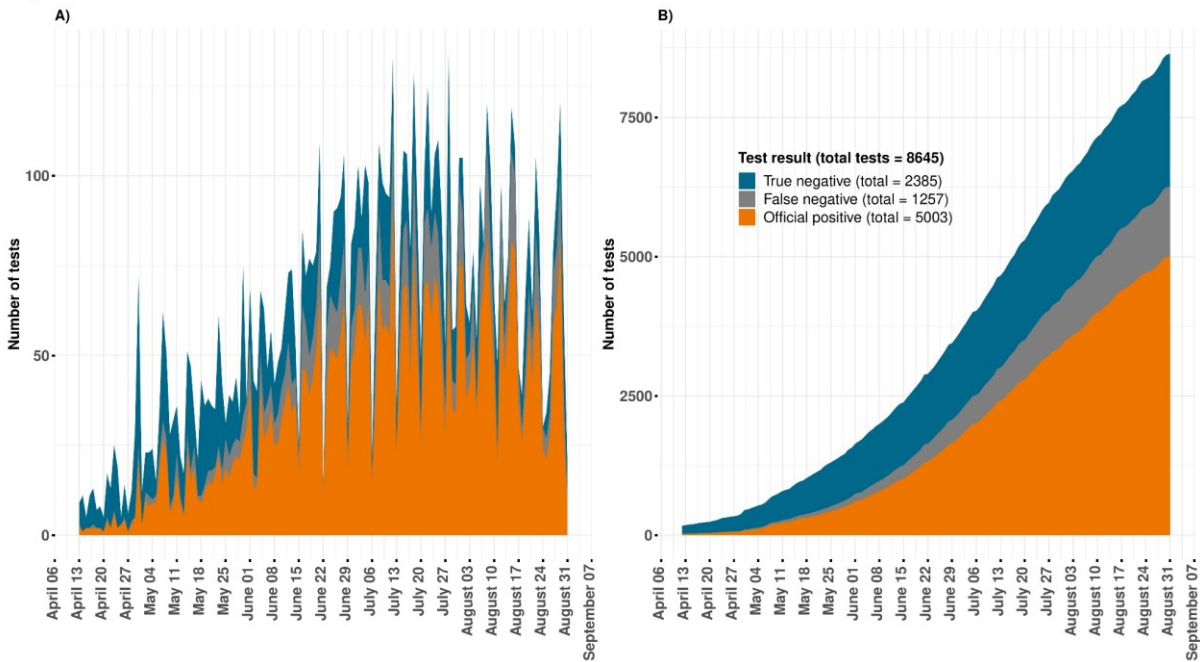

Study period February 27 – August 31 (shown from April 13). A) represents daily counts, while B) represents accumulated cases.

130

131

**Table SE. Official and estimated COVID-19 cases by date of reporting in NUEVO LEÓN**

| Variable                       | Official count | Average test estimates | Best test estimates | Worst test estimates |
|--------------------------------|----------------|------------------------|---------------------|----------------------|
| N                              | 66 869         | 66 869                 | 66 869              | 66 869               |
| Positive tests                 | 29 830 (44.6%) | 40 632 (60.8%)         | 35 328 (52.8%)      | 52 169 (78%)         |
| Negative tests                 | 37 039 (55.4%) | 26 237 (39.2%)         | 31 541 (47.2%)      | 14 700 (22%)         |
| Estimated false negative tests | -              | 10 802 (16.2%)         | 5498 (8.2%)         | 22 339 (33.4%)       |
| Overall ICU count              | 671            | 796                    | 731                 | 931                  |
| Overall Death count            | 160            | 240                    | 196                 | 329                  |

132

133

**Figure SE. NUEVO LEÓN**

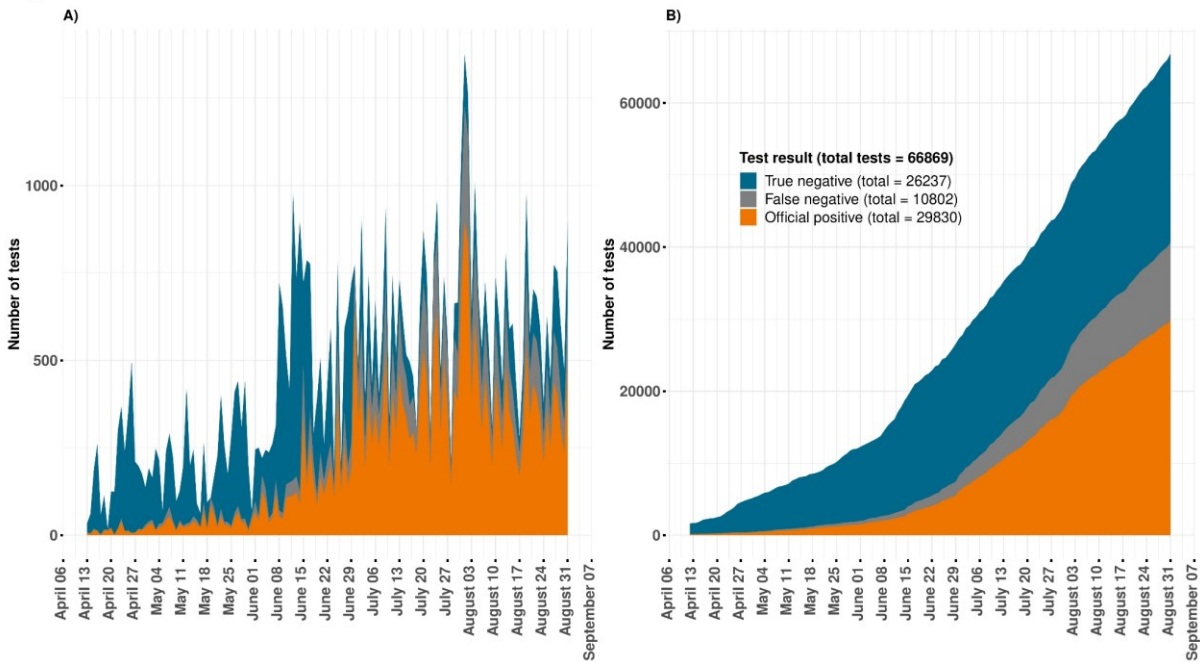

Study period February 27 – August 31 (shown from April 13). A) represents daily counts, while B) represents accumulated cases.

134

135

**Table SE. Official and estimated COVID-19 cases by date of reporting in OAXACA**

| Variable                       | Official count | Average test estimates | Best test estimates | Worst test estimates |
|--------------------------------|----------------|------------------------|---------------------|----------------------|
| N                              | 20 017         | 20 017                 | 20 017              | 20 017               |
| Positive tests                 | 13 793 (68.9%) | 17 914 (89.5%)         | 15 749 (78.7%)      | 20 017 (100%)        |
| Negative tests                 | 6224 (31.1%)   | 2103 (10.5%)           | 4268 (21.3%)        | 0 (0%)               |
| Estimated false negative tests | -              | 4121 (20.6%)           | 1956 (9.8%)         | 6224 (31.1%)         |
| Overall ICU count              | 269            | 339                    | 297                 | 409                  |
| Overall Death count            | 434            | 821                    | 619                 | 1234                 |

136

137

**Figure SE. OAXACA**

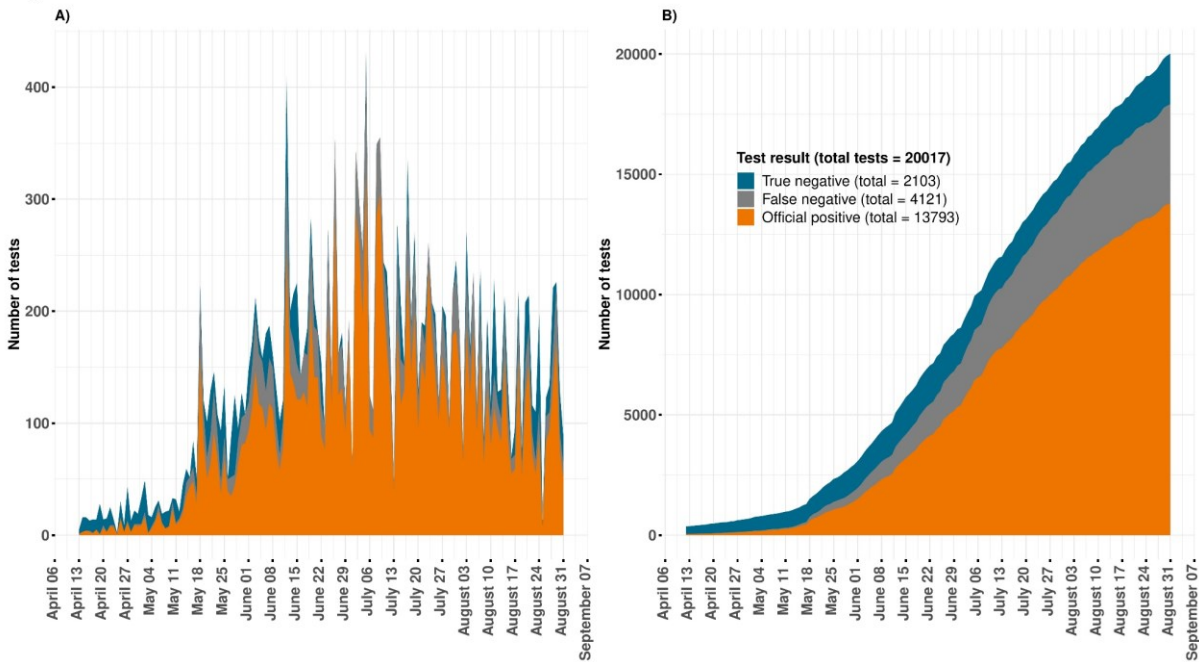

Study period February 27 – August 31 (shown from April 13). A) represents daily counts, while B) represents accumulated cases.

138

139

**Table SE. Official and estimated COVID-19 cases by date of reporting in PUEBLA**

| Variable                       | Official count | Average test estimates | Best test estimates | Worst test estimates |
|--------------------------------|----------------|------------------------|---------------------|----------------------|
| N                              | 56 600         | 56 600                 | 56 600              | 56 600               |
| Positive tests                 | 28 183 (49.8%) | 39 848 (70.4%)         | 34 192 (60.4%)      | 51 630 (91.2%)       |
| Negative tests                 | 28 417 (50.2%) | 16 752 (29.6%)         | 22 408 (39.6%)      | 4970 (8.8%)          |
| Estimated false negative tests | -              | 11 665 (20.6%)         | 6009 (10.6%)        | 23 447 (41.4%)       |
| Overall ICU count              | 448            | 506                    | 473                 | 583                  |
| Overall Death count            | 840            | 1277                   | 1062                | 1714                 |

140

141

**Figure SE. PUEBLA**

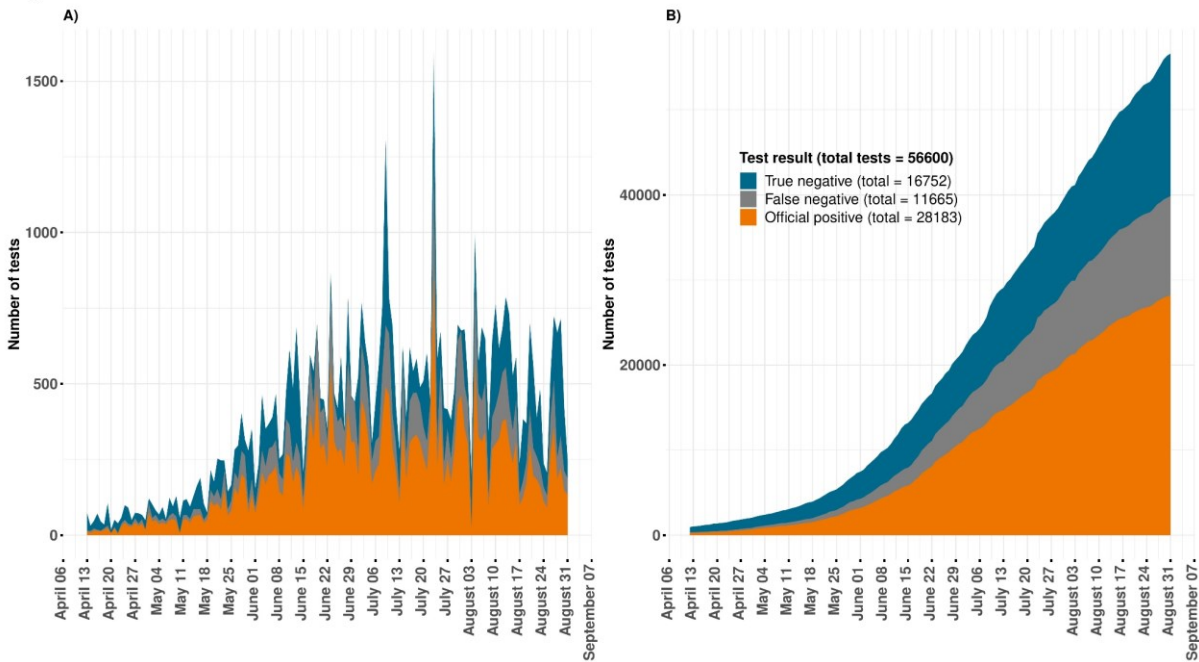

Study period February 27 – August 31 (shown from April 13). A) represents daily counts, while B) represents accumulated cases.

142

143



**Table SE. Official and estimated COVID-19 cases by date of reporting in QUERÉTARO**

| Variable                       | Official count | Average test estimates | Best test estimates | Worst test estimates |
|--------------------------------|----------------|------------------------|---------------------|----------------------|
| N                              | 11 571         | 11 571                 | 11 571              | 11 571               |
| Positive tests                 | 6623 (57.2%)   | 8524 (73.7%)           | 7362 (63.6%)        | 10 865 (93.9%)       |
| Negative tests                 | 4948 (42.8%)   | 3047 (26.3%)           | 4209 (36.4%)        | 706 (6.1%)           |
| Estimated false negative tests | -              | 1901 (16.4%)           | 739 (6.4%)          | 4242 (36.7%)         |
| Overall ICU count              | 91             | 112                    | 94                  | 153                  |
| Overall Death count            | 67             | 92                     | 70                  | 133                  |

144

145

**Figure SE. QUERÉTARO**

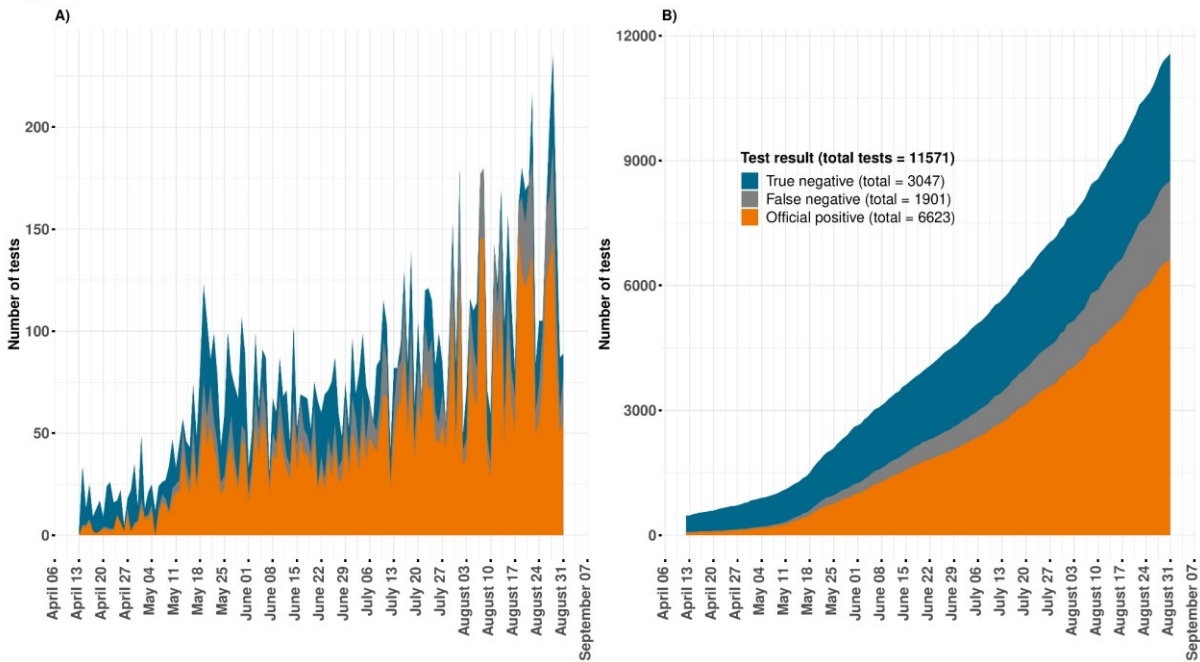

Study period February 27 – August 31 (shown from April 13). A) represents daily counts, while B) represents accumulated cases.

146

147



**Table SE. Official and estimated COVID-19 cases by date of reporting in QUINTANA ROO**

| Variable                       | Official count | Average test estimates | Best test estimates | Worst test estimates |
|--------------------------------|----------------|------------------------|---------------------|----------------------|
| N                              | 16 634         | 16 634                 | 16 634              | 16 634               |
| Positive tests                 | 10 236 (61.5%) | 13 292 (79.9%)         | 11 708 (70.4%)      | 16 328 (98.2%)       |
| Negative tests                 | 6398 (38.5%)   | 3342 (20.1%)           | 4926 (29.6%)        | 306 (1.8%)           |
| Estimated false negative tests | -              | 3056 (18.4%)           | 1472 (8.8%)         | 6092 (36.6%)         |
| Overall ICU count              | 223            | 255                    | 230                 | 305                  |
| Overall Death count            | 256            | 397                    | 315                 | 560                  |

148

149

**Figure SE. QUINTANA ROO**

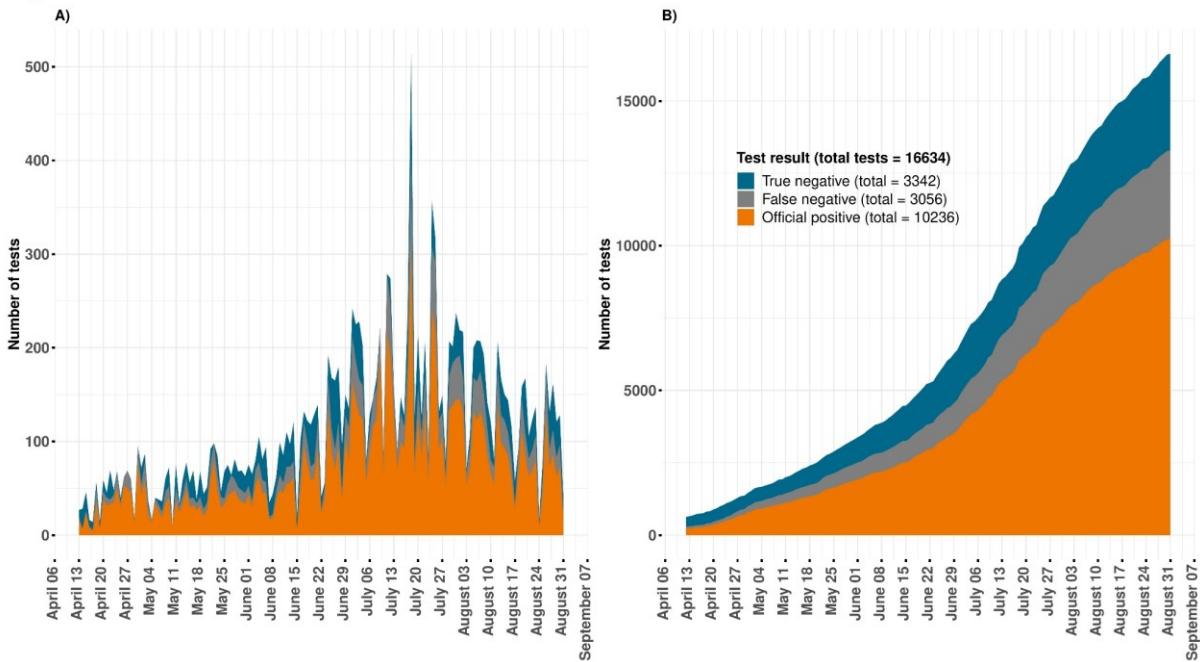

Study period February 27 – August 31 (shown from April 13). A) represents daily counts, while B) represents accumulated cases.

150

151

**Table SE. Official and estimated COVID-19 cases by date of reporting in SAN LUIS POTOSÍ**

| Variable                       | Official count | Average test estimates | Best test estimates | Worst test estimates |
|--------------------------------|----------------|------------------------|---------------------|----------------------|
| N                              | 38 664         | 38 664                 | 38 664              | 38 664               |
| Positive tests                 | 18 343 (47.4%) | 24 616 (63.7%)         | 21 532 (55.7%)      | 30 699 (79.4%)       |
| Negative tests                 | 20 321 (52.6%) | 14 048 (36.3%)         | 17 132 (44.3%)      | 7965 (20.6%)         |
| Estimated false negative tests | -              | 6273 (16.2%)           | 3189 (8.2%)         | 12 356 (32%)         |
| Overall ICU count              | 151            | 180                    | 159                 | 223                  |
| Overall Death count            | 336            | 472                    | 403                 | 596                  |

152

153

**Figure SE. SAN LUIS POTOSÍ**

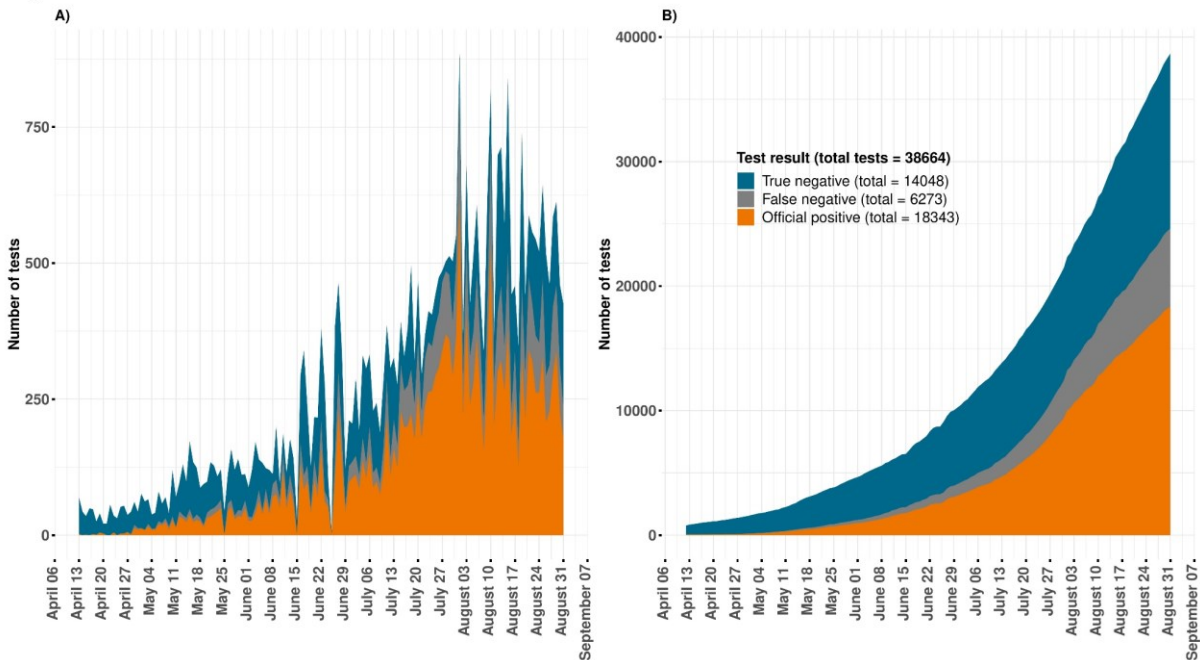

Study period February 27 – August 31 (shown from April 13). A) represents daily counts, while B) represents accumulated cases.

154

155

**Table SE. Official and estimated COVID-19 cases by date of reporting in SINALOA**

| Variable                       | Official count | Average test estimates | Best test estimates | Worst test estimates |
|--------------------------------|----------------|------------------------|---------------------|----------------------|
| N                              | 28 076         | 28 076                 | 28 076              | 28 076               |
| Positive tests                 | 16 191 (57.7%) | 22 092 (78.7%)         | 19 179 (68.3%)      | 27 795 (99%)         |
| Negative tests                 | 11 885 (42.3%) | 5984 (21.3%)           | 8897 (31.7%)        | 281 (1%)             |
| Estimated false negative tests | -              | 5901 (21%)             | 2988 (10.6%)        | 11 604 (41.3%)       |
| Overall ICU count              | 597            | 704                    | 643                 | 804                  |
| Overall Death count            | 930            | 1626                   | 1271                | 2293                 |

156

157

**Figure SE. SINALOA**

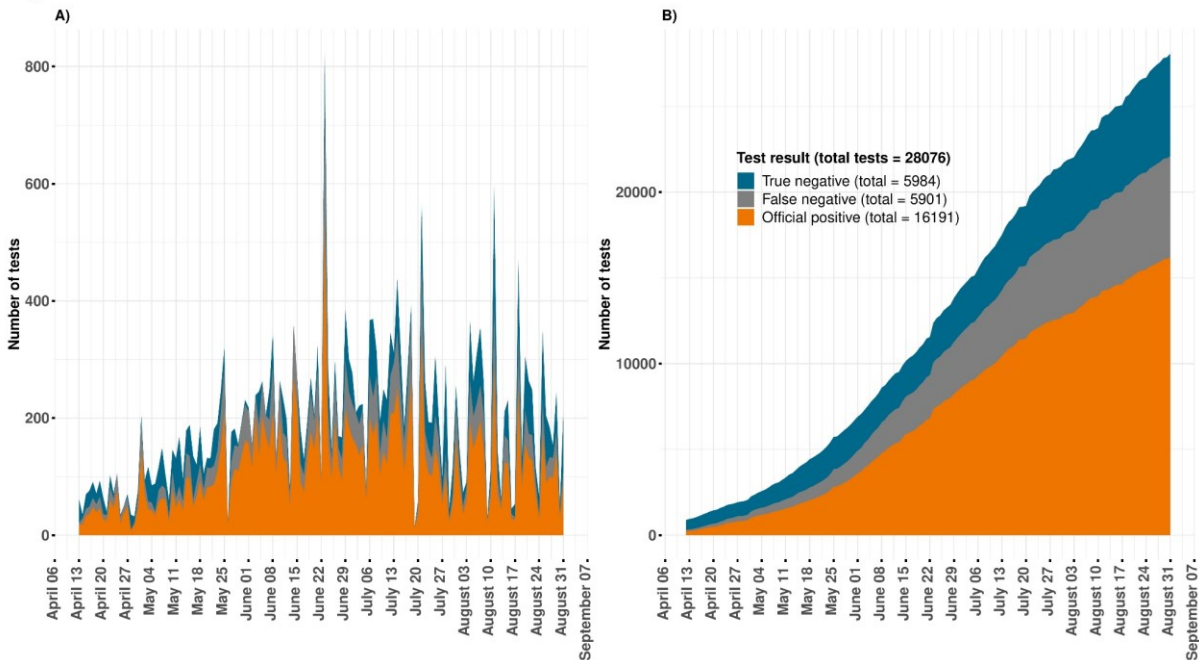

Study period February 27 – August 31 (shown from April 13). A) represents daily counts, while B) represents accumulated cases.

158

159

**Table SE. Official and estimated COVID-19 cases by date of reporting in SONORA**

| Variable                       | Official count | Average test estimates | Best test estimates | Worst test estimates |
|--------------------------------|----------------|------------------------|---------------------|----------------------|
| N                              | 36 460         | 36 460                 | 36 460              | 36 460               |
| Positive tests                 | 21 210 (58.2%) | 28 618 (78.5%)         | 24 925 (68.4%)      | 35 917 (98.5%)       |
| Negative tests                 | 15 250 (41.8%) | 7842 (21.5%)           | 11 535 (31.6%)      | 543 (1.5%)           |
| Estimated false negative tests | -              | 7408 (20.3%)           | 3715 (10.2%)        | 14 707 (40.3%)       |
| Overall ICU count              | 145            | 180                    | 161                 | 221                  |
| Overall Death count            | 884            | 1597                   | 1234                | 2314                 |

160

161

**Figure SE. SONORA**

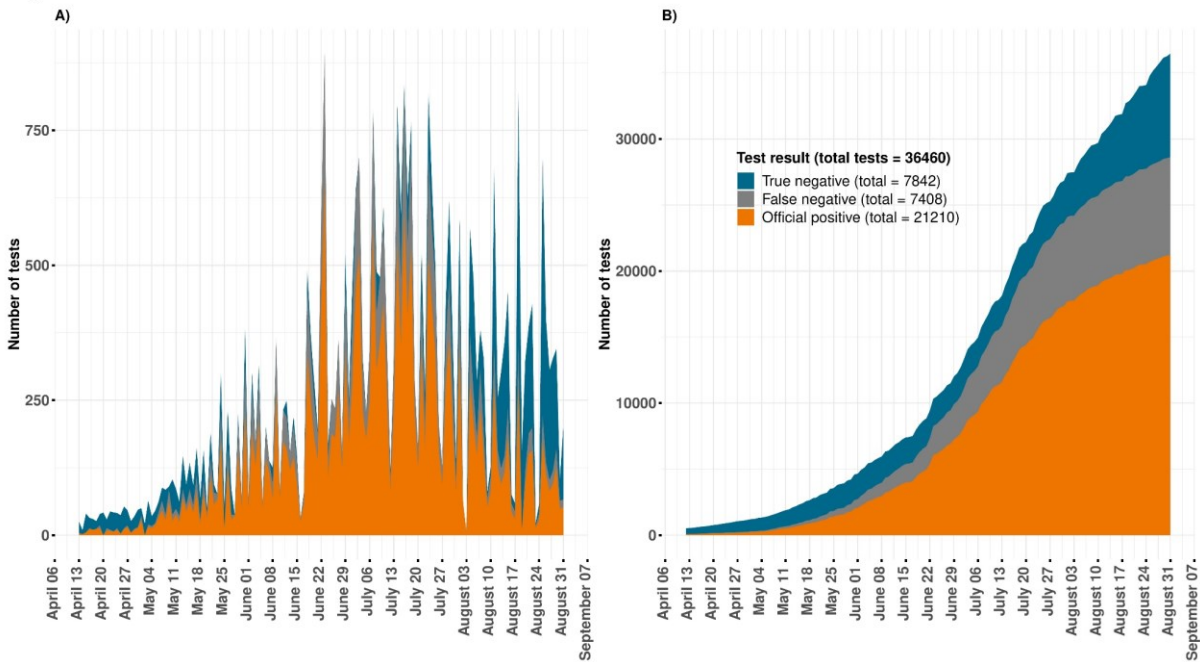

Study period February 27 – August 31 (shown from April 13). A) represents daily counts, while B) represents accumulated cases.

162

163

**Table SE. Official and estimated COVID-19 cases by date of reporting in TABASCO**

| Variable                       | Official count | Average test estimates | Best test estimates | Worst test estimates |
|--------------------------------|----------------|------------------------|---------------------|----------------------|
| N                              | 55 312         | 55 312                 | 55 312              | 55 312               |
| Positive tests                 | 28 833 (52.1%) | 41 329 (74.7%)         | 35 799 (64.7%)      | 52 230 (94.4%)       |
| Negative tests                 | 26 479 (47.9%) | 13 983 (25.3%)         | 19 513 (35.3%)      | 3082 (5.6%)          |
| Estimated false negative tests | -              | 12 496 (22.6%)         | 6966 (12.6%)        | 23 397 (42.3%)       |
| Overall ICU count              | 238            | 271                    | 252                 | 310                  |
| Overall Death count            | 568            | 878                    | 730                 | 1155                 |

164

165

**Figure SE. TABASCO**

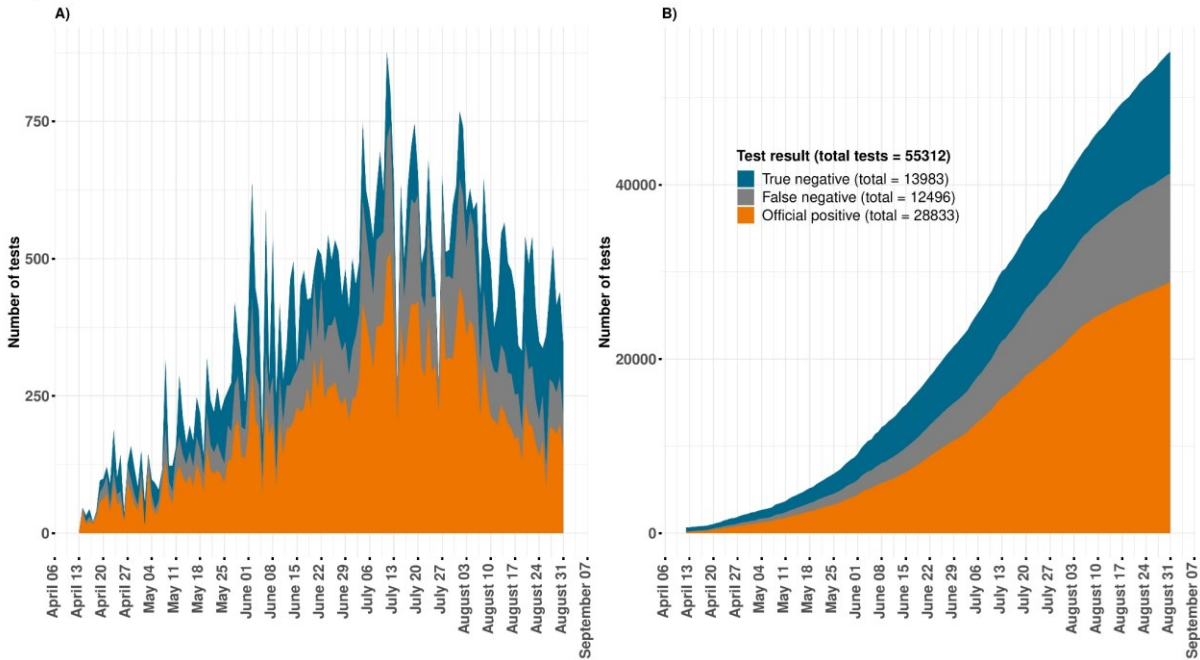

Study period February 27 – August 31 (shown from April 13). A) represents daily counts, while B) represents accumulated cases.

166

167

**Table SE. Official and estimated COVID-19 cases by date of reporting in TAMAULIPAS**

| Variable                       | Official count | Average test estimates | Best test estimates | Worst test estimates |
|--------------------------------|----------------|------------------------|---------------------|----------------------|
| N                              | 54 902         | 54 902                 | 54 902              | 54 902               |
| Positive tests                 | 24 257 (44.2%) | 34 096 (62.1%)         | 28 952 (52.7%)      | 45 679 (83.2%)       |
| Negative tests                 | 30 645 (55.8%) | 20 806 (37.9%)         | 25 950 (47.3%)      | 9223 (16.8%)         |
| Estimated false negative tests | -              | 9839 (17.9%)           | 4695 (8.6%)         | 21 422 (39%)         |
| Overall ICU count              | 129            | 174                    | 149                 | 247                  |
| Overall Death count            | 510            | 806                    | 649                 | 1132                 |

168

169

**Figure SE. TAMAULIPAS**

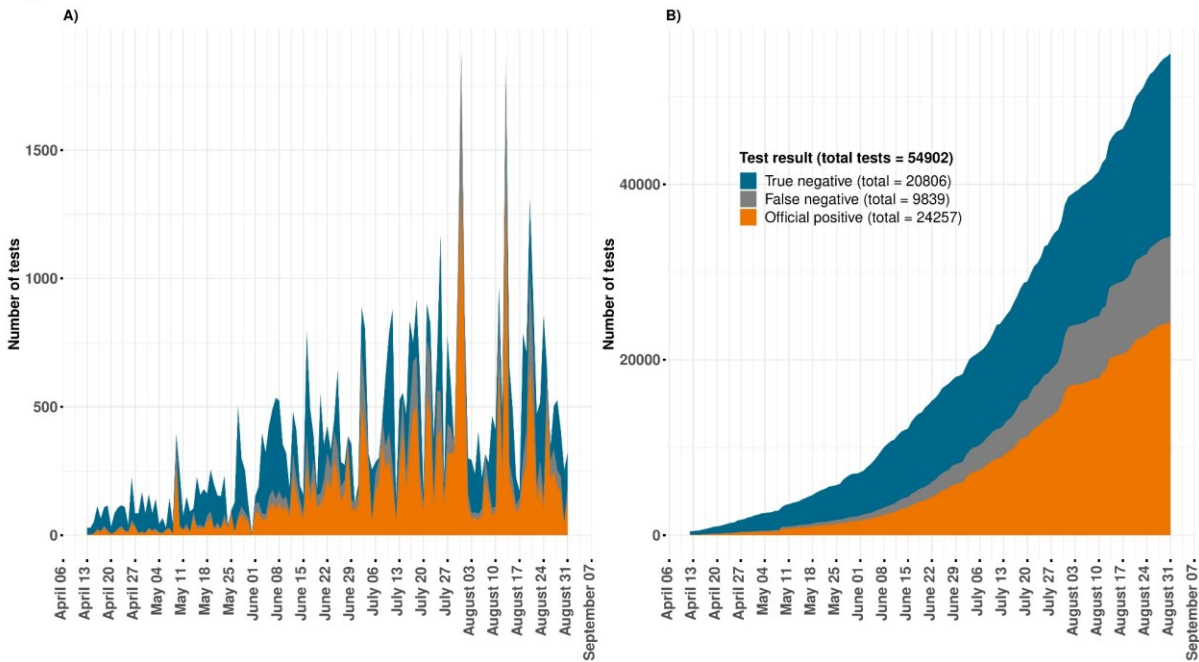

Study period February 27 – August 31 (shown from April 13). A) represents daily counts, while B) represents accumulated cases.

170

171

**Table SE. Official and estimated COVID-19 cases by date of reporting in TLAXCALA**

| Variable                       | Official count | Average test estimates | Best test estimates | Worst test estimates |
|--------------------------------|----------------|------------------------|---------------------|----------------------|
| N                              | 15 998         | 15 998                 | 15 998              | 15 998               |
| Positive tests                 | 5571 (34.8%)   | 7434 (46.5%)           | 6396 (40%)          | 9485 (59.3%)         |
| Negative tests                 | 10 427 (65.2%) | 8564 (53.5%)           | 9602 (60%)          | 6513 (40.7%)         |
| Estimated false negative tests | -              | 1863 (11.6%)           | 825 (5.2%)          | 3914 (24.5%)         |
| Overall ICU count              | 441            | 512                    | 466                 | 599                  |
| Overall Death count            | 118            | 140                    | 123                 | 180                  |

172

173

**Figure SE. TLAXCALA**

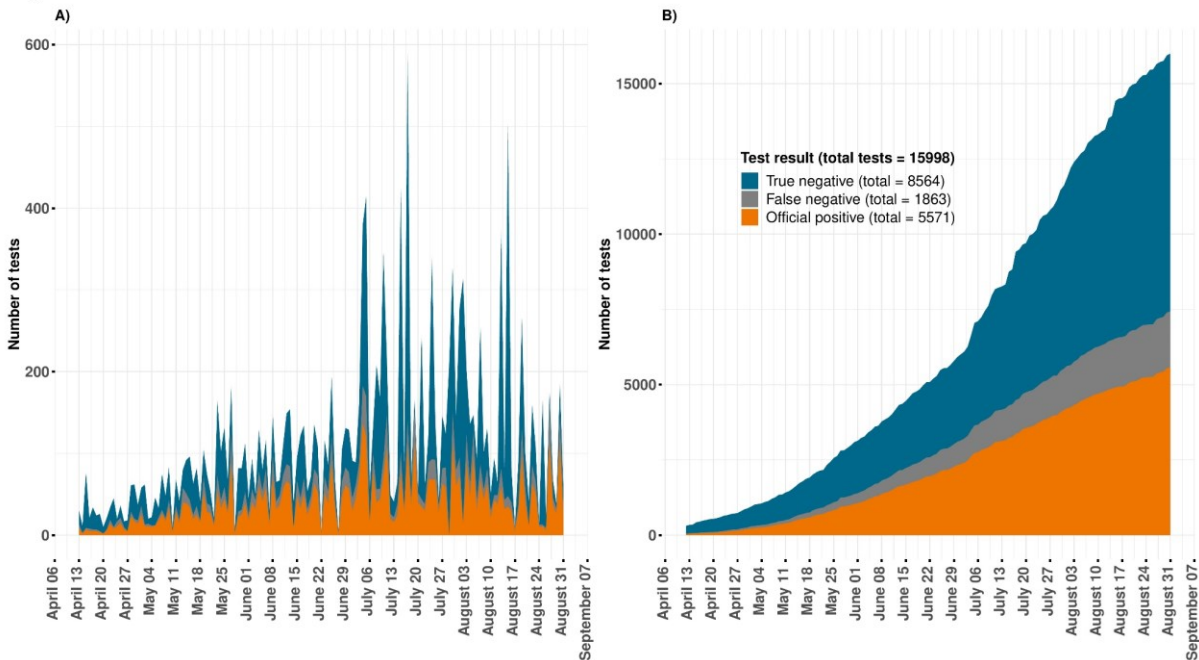

Study period February 27 – August 31 (shown from April 13). A) represents daily counts, while B) represents accumulated cases.

174

175



**Table SE. Official and estimated COVID-19 cases by date of reporting in VERACRUZ**

| Variable                       | Official count | Average test estimates | Best test estimates | Worst test estimates |
|--------------------------------|----------------|------------------------|---------------------|----------------------|
| N                              | 41 679         | 41 679                 | 41 679              | 41 679               |
| Positive tests                 | 28 053 (67.3%) | 37 560 (90.1%)         | 32 986 (79.1%)      | 41 679 (100%)        |
| Negative tests                 | 13 626 (32.7%) | 4119 (9.9%)            | 8693 (20.9%)        | 0 (0%)               |
| Estimated false negative tests | -              | 9507 (22.8%)           | 4933 (11.8%)        | 13 626 (32.7%)       |
| Overall ICU count              | 616            | 745                    | 668                 | 862                  |
| Overall Death count            | 915            | 1669                   | 1293                | 2396                 |

176

177

**Figure SE. VERACRUZ**

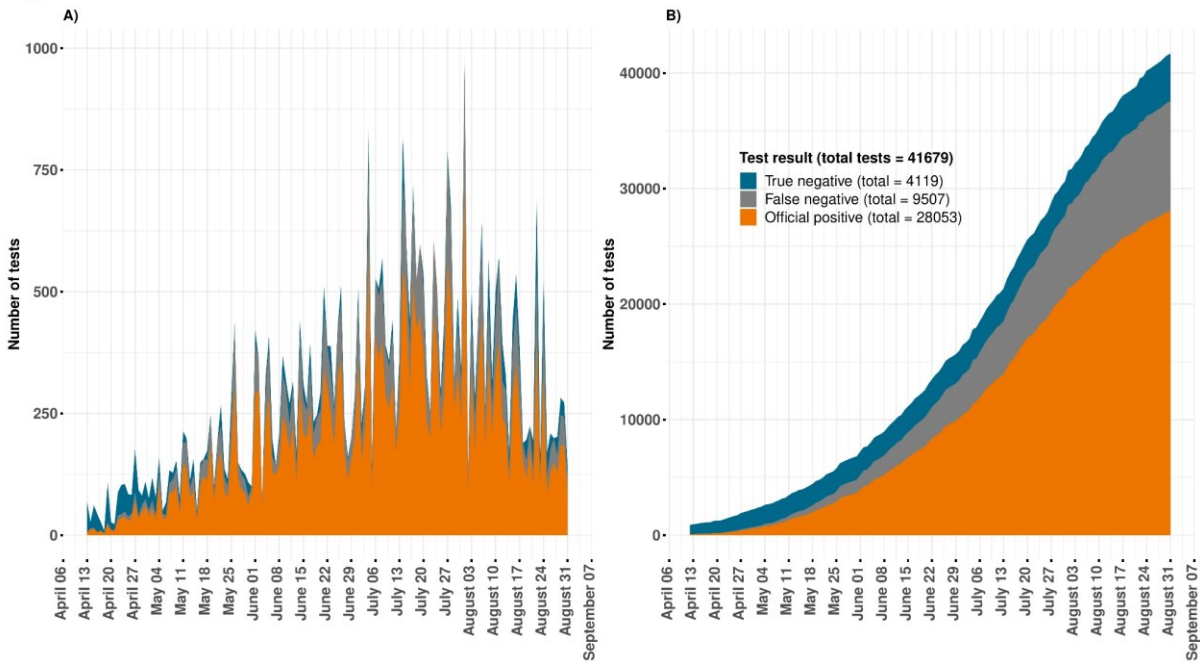

Study period February 27 – August 31 (shown from April 13). A) represents daily counts, while B) represents accumulated cases.

178

179



**Table SE. Official and estimated COVID-19 cases by date of reporting in YUCATÁN**

| Variable                       | Official count | Average test estimates | Best test estimates | Worst test estimates |
|--------------------------------|----------------|------------------------|---------------------|----------------------|
| N                              | 27 668         | 27 668                 | 27 668              | 27 668               |
| Positive tests                 | 14 973 (54.1%) | 19 776 (71.5%)         | 17 272 (62.4%)      | 24 996 (90.3%)       |
| Negative tests                 | 12 695 (45.9%) | 7892 (28.5%)           | 10 396 (37.6%)      | 2672 (9.7%)          |
| Estimated false negative tests | -              | 4803 (17.4%)           | 2299 (8.3%)         | 10 023 (36.2%)       |
| Overall ICU count              | 159            | 180                    | 162                 | 208                  |
| Overall Death count            | 206            | 291                    | 246                 | 396                  |

180

181

**Figure SE. YUCATÁN**

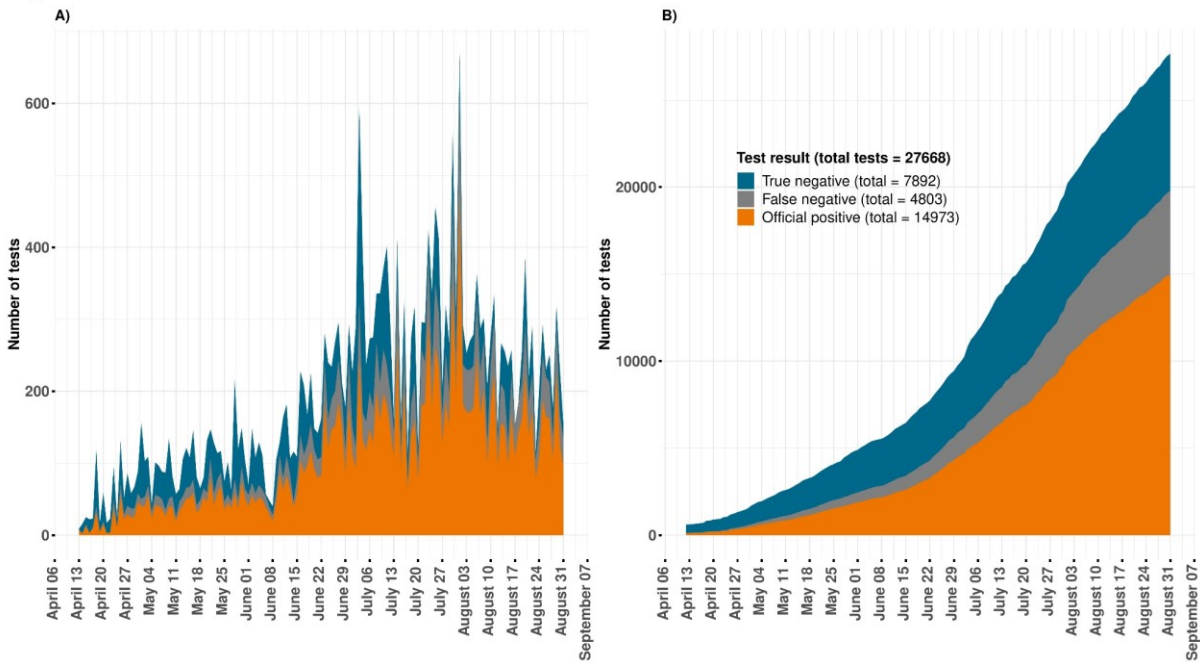

182

183

Study period February 27 – August 31 (shown from April 13). A) represents daily counts, while B) represents accumulated cases.

**Table SE. Official and estimated COVID-19 cases by date of reporting in ZACATECAS**

| Variable                       | Official count | Average test estimates | Best test estimates | Worst test estimates |
|--------------------------------|----------------|------------------------|---------------------|----------------------|
| N                              | 11 665         | 11 665                 | 11 665              | 11 665               |
| Positive tests                 | 5282 (45.3%)   | 6778 (58.1%)           | 5976 (51.2%)        | 8289 (71.1%)         |
| Negative tests                 | 6383 (54.7%)   | 4887 (41.9%)           | 5689 (48.8%)        | 3376 (28.9%)         |
| Estimated false negative tests | -              | 1496 (12.8%)           | 694 (5.9%)          | 3007 (25.8%)         |
| Overall ICU count              | 183            | 194                    | 184                 | 223                  |
| Overall Death count            | 75             | 87                     | 77                  | 118                  |

184

185

**Figure SE. ZACATECAS**

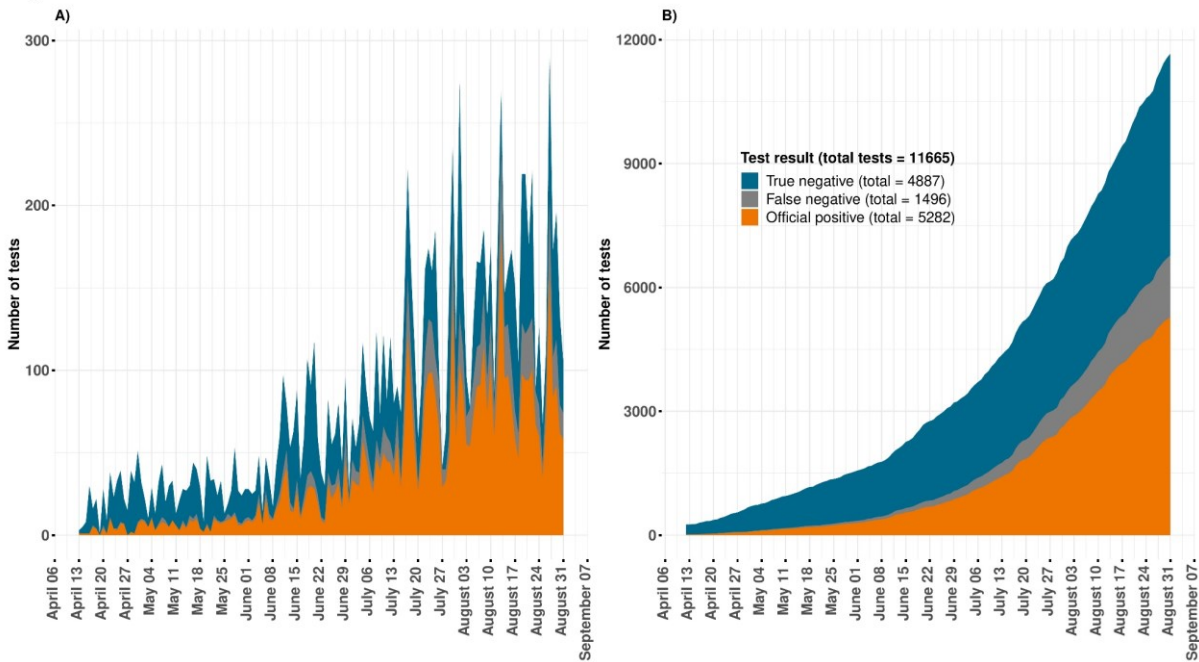

Study period February 27 – August 31 (shown from April 13). A) represents daily counts, while B) represents accumulated cases.

186

187

188
